# Supplementary material for: The Combined Use of Orf Virus and PAK4 Inhibitor Exerts Anti-tumor Effect in Breast Cancer
Source: Front Microbiol. 2022 Mar 23;13:845259. doi: 10.3389/fmicb.2022.845259 (PMC8984157; doi:10.3389/fmicb.2022.845259)
Supplement: Supplementary file 1 [file Data_Sheet_1.csv]

Supplementary Data 1. Next-generation sequencing data
sgRNA	Gene	CTL-1	CTL-2	CTL-3	MCF-7-K1	MCF-7-K2	MCF-7-K3	MCF-7-K4
sgNEK2_5_chr1:211846982-	NEK2	1357	3378	2367	1456	1163	654	814
sgNEK9_2_chr14:75573273-	NEK9	2458	224	1341	844	1228	867	1525
sgRIOK2_3_chr5:96514824-	RIOK2	0	0	0	0	1	0	0
sgCDK1_3_chr10:62551914+	CDK1	0	0	0	1	0	0	0
sgMAPK12_5_chr22:50693764-	MAPK12	24368	8007	16187	15598	15405	26298	35909
sgBRSK1_9_chr19:55817693-	BRSK1	1977	362	1169	181	275	1464	2823
sgFGFR4_3_chr5:176517973+	FGFR4	2224	2847	2535	330	373	845	1141
sgKSR1_10_chr17:25924372-	KSR1	963	2	82	1	3	1	1
sgACVR1_6_chr2:158636908+	ACVR1	0	0	0	0	0	3	1
sgCDK15_8_chr2:202672293+	CDK15	0	0	0	0	0	0	1
sgPDPK1_4_chr16:2588127-	PDPK1	0	0	0	0	0	0	0
sgADRBK2_1_chr22:26091098+	ADRBK2	0	0	0	0	0	0	0
sgSGK494_7_chr17:26940655+	SGK494	5683	5817	5750	2870	3821	1652	2870
sgEIF2AK3_6_chr2:88926530-	EIF2AK3	0	1	0	0	1	0	0
sgTXK_9_chr4:48115254-	TXK	1901	20	960	897	1218	1180	2105
sgMAPK3_2_chr16:30134419-	MAPK3	0	0	0	0	0	0	0
CTRL0017	CTRL0017	286	0	0	0	0	0	0
sgROR1_2_chr1:64603136+	ROR1	4865	6148	5506	1914	2494	1703	2827
sgMAP4K1_1_chr19:39104524+	MAP4K1	2	1	0	2	3	315	531
sgADCK1_3_chr14:78374160-	ADCK1	535	7	271	1378	1497	396	540
sgPRKD3_8_chr2:37494660-	PRKD3	852	1	436	0	0	0	1
sgBRSK1_4_chr19:55815441-	BRSK1	4	0	0	0	0	0	2
sgCDK11A_2_chr1:1647807-	CDK11A	0	1	0	0	0	1	0
sgTEC_9_chr4:48148340+	TEC	1382	8	695	578	749	607	842
sgMYLK2_10_chr20:30407931+	MYLK2	3	0	0	1	2	1	1
CTRL0033	CTRL0033	5639	1604	3621	592	511	31	17
sgPTK7_3_chr6:43100280+	PTK7	0	0	0	0	0	1	0
sgMAP3K12_5_chr12:53879841+	MAP3K12	382	1	0	0	0	0	0
sgDAPK2_9_chr15:64263676+	DAPK2	1953	75	1014	1	0	326	566
sgCSNK2A2_9_chr16:58231578+	CSNK2A2	3315	1069	2192	288	325	1596	2649
sgVRK1_9_chr14:97322516-	VRK1	0	0	0	0	0	0	0
sgCSNK2A2_3_chr16:58220661-	CSNK2A2	375	0	0	0	0	0	0
sgIRAK2_7_chr3:10261391-	IRAK2	13737	10459	12098	8303	8449	5671	7871
sgMAP2K1_1_chr15:66727377+	MAP2K1	0	0	0	0	0	0	0
sgSGK3_10_chr8:67743525+	SGK3	0	0	0	0	0	0	0
sgC9orf96_7_chr9:136266986+	C9orf96	786	0	0	0	0	0	0
sgPDK2_6_chr17:48183351-	PDK2	575	2493	1534	7	2	13	1
sgROR2_8_chr9:94519764-	ROR2	0	0	0	0	0	0	1
sgANKK1_5_chr11:113258769-	ANKK1	1759	1252	1505	240	351	12	11
sgPDGFRB_2_chr5:149513155-	PDGFRB	1374	1791	1582	491	497	12	15
sgSGK196_9_chr8:42958819+	SGK196	1044	1797	1420	392	367	406	524
sgCDKL4_10_chr2:39411752-	CDKL4	0	0	0	0	0	0	0
sgMAP2K7_8_chr19:7968885+	MAP2K7	6702	4222	5462	3846	3782	4573	6299
sgERBB4_5_chr2:212652822+	ERBB4	0	0	0	0	0	1	0
sgADCK3_9_chr1:227171511+	ADCK3	870	12	0	1333	1280	444	616
sgCLK3_5_chr15:74914854+	CLK3	0	0	0	0	0	0	0
sgMAP3K12_1_chr12:53876551-	MAP3K12	3	0	0	0	0	3	1
sgRIPK4_5_chr21:43166775+	RIPK4	367	2456	1411	3	4	268	245
sgADRBK2_5_chr22:26107056-	ADRBK2	2515	11522	7018	3105	3600	2734	4558
sgSBK1_7_chr16:28330409-	SBK1	1898	1730	1814	142	178	1396	2102
sgTSSK6_5_chr19:19626125-	TSSK6	413	0	0	0	1	291	375
sgSBK1_8_chr16:28328781-	SBK1	1144	4685	2914	398	352	237	334
sgMAPK15_4_chr8:144801536+	MAPK15	528	0	0	0	0	1	1
sgSTK40_3_chr1:36823827+	STK40	8998	8964	8981	2925	2714	2596	3448
sgIGF1R_3_chr15:99250984-	IGF1R	0	3	0	1	1	0	1
sgPRKCI_10_chr3:169985699+	PRKCI	0	1	0	0	0	0	0
sgCDK19_6_chr6:110944040-	CDK19	1	0	0	0	0	0	0
sgICK_5_chr6:52871150-	ICK	410	6	208	1007	1198	319	515
sgPBK_1_chr8:27668592-	PBK	1	0	0	0	1	1	1
sgMAP2K6_7_chr17:67516479+	MAP2K6	578	7	293	613	679	342	588
sgMOS_5_chr8:57026490+	MOS	0	0	0	0	0	0	0
sgSTYK1_2_chr12:10783730-	STYK1	0	0	0	0	0	0	1
sgULK3_4_chr15:75132887+	ULK3	0	4	0	405	637	5	10
sgPLK2_8_chr5:57755651+	PLK2	283	0	0	0	0	0	0
sgCDK13_7_chr7:40027811-	CDK13	0	1114	594	1	0	3	0
sgPRKCD_8_chr3:53212440-	PRKCD	0	0	0	0	0	0	1
sgRPS6KA4_7_chr11:64128686+	RPS6KA4	0	0	0	0	1	0	0
sgKDR_3_chr4:55984909-	KDR	0	2	0	0	0	0	2
sgMYO3A_4_chr10:26462709+	MYO3A	780	11	395	3	9	649	1055
sgDDR1_4_chr6:30857174-	DDR1	0	1	0	331	357	3	7
sgPAK3_7_chrX:110406167-	PAK3	1	1	0	0	1	191	287
sgSCYL1_4_chr11:65293778+	SCYL1	30996	59209	45103	9455	9107	9041	11935
sgSTK35_9_chr20:2083592+	STK35	1	0	0	0	0	0	0
sgMAPK3_4_chr16:30129009+	MAPK3	756	2	379	0	1	392	509
sgTEC_3_chr4:48147456-	TEC	607	1	30	0	0	0	0
sgTSSK6_6_chr19:19626030+	TSSK6	0	1	0	1	1	2	0
sgPRKACG_1_chr9:71628809-	PRKACG	0	0	0	0	0	0	0
sgMARK3_9_chr14:103918299+	MARK3	13392	10988	12190	8124	8678	6315	9727
sgIRAK2_3_chr3:10254996+	IRAK2	0	0	0	0	0	1	0
sgAURKA_9_chr20:54961322-	AURKA	0	2	0	0	0	0	0
sgTRRAP_3_chr7:98574140+	TRRAP	720	382	551	669	945	284	482
sgVRK1_2_chr14:97342420+	VRK1	10	4123	2066	754	671	31	17
sgCSNK1A1L_3_chr13:37679278-	CSNK1A1L	241	2	120	4	5	0	1
sgEPHA8_9_chr1:22913110-	EPHA8	5	4	0	0	1	2	4
sgKSR2_7_chr12:118405865+	KSR2	0	1	0	326	320	7	10
sgSRMS_8_chr20:62178749-	SRMS	6889	11567	9228	929	898	2639	3623
sgINSRR_1_chr1:156823880+	INSRR	2	1	0	1	2	1	1
sgARAF_10_chrX:47424493-	ARAF	0	0	0	0	1	0	0
sgERN2_7_chr16:23718114-	ERN2	13744	14526	14145	8856	8815	6767	9144
sgSRC_9_chr20:36012617+	SRC	2396	3894	3145	772	709	371	481
sgULK4_8_chr3:41841636+	ULK4	1	0	0	0	0	0	2
sgPHKG2_4_chr16:30762475-	PHKG2	0	0	0	130	160	4	1
sgMAPK13_8_chr6:36098433-	MAPK13	3533	10376	6954	4516	4352	3472	4485
sgRIPK3_10_chr14:24808316+	RIPK3	1056	29	540	439	842	333	544
sgCDC42BPG_8_chr11:64609287-	CDC42BPG	0	1	0	166	173	2	5
sgULK3_2_chr15:75135347-	ULK3	7540	798	4169	6522	6887	5331	8400
sgNEK6_4_chr9:127074798-	NEK6	10927	16840	13883	15672	13328	9122	11835
sgDCLK3_2_chr3:36779279-	DCLK3	9	1072	540	2023	2336	338	560
sgSTK10_1_chr5:171583660+	STK10	770	3	385	4	4	246	539
sgBRD2_6_chr6:32946026+	BRD2	1	6	3	663	756	7	12
sgPTK2_10_chr8:141745385-	PTK2	1155	940	1047	950	1322	628	1084
sgRYK_1_chr3:133969477-	RYK	617	0	0	0	0	0	0
sgCDK1_8_chr10:62551970+	CDK1	520	0	260	0	0	132	256
sgEPHA2_7_chr1:16460949+	EPHA2	1	1	0	0	0	0	2
sgPKN1_9_chr19:14552223-	PKN1	0	0	0	0	0	102	155
sgPDGFRA_1_chr4:55127278-	PDGFRA	574	0	0	0	0	0	0
sgBTK_2_chrX:100611114+	BTK	0	1	0	0	0	0	0
sgSTK40_9_chr1:36820794+	STK40	1528	4	700	733	638	796	1059
sgNLK_2_chr17:26370013-	NLK	0	0	0	0	1	0	2
sgRIPK4_6_chr21:43164222+	RIPK4	0	0	0	0	0	0	0
sgULK1_7_chr12:132396501+	ULK1	0	0	0	0	1	0	0
sgPIM2_4_chrX:48775068+	PIM2	350	1976	1163	361	351	9	8
sgTSSK4_6_chr14:24676442-	TSSK4	6339	4212	5275	1720	1860	1580	2142
sgNEK5_1_chr13:52660415-	NEK5	1	1259	640	3	0	8	1
sgSRC_3_chr20:36028676+	SRC	4	1	0	239	684	4	7
sgLRRK1_1_chr15:101562062-	LRRK1	0	0	0	0	0	0	0
sgFGFR3_1_chr4:1801487+	FGFR3	1914	1762	1838	5	2	452	675
CTRL0078	CTRL0078	0	1	0	0	1	0	1
sgMYLK3_8_chr16:46766525-	MYLK3	1	0	0	0	0	0	0
sgTTK_5_chr6:80720634+	TTK	5	0	0	1	5	0	0
sgCDK4_6_chr12:58145367-	CDK4	341	2	170	330	326	2	5
sgPIK3R4_8_chr3:130463685-	PIK3R4	0	2	0	0	0	0	0
CTRL0002	CTRL0002	667	4	334	387	355	11	2
sgDSTYK_9_chr1:205156635-	DSTYK	0	0	0	0	0	0	0
sgLIMK1_5_chr7:73511475+	LIMK1	0	0	0	0	0	0	0
sgNTRK1_5_chr1:156838355+	NTRK1	0	0	0	2	0	429	559
sgCAMK2A_10_chr5:149644507+	CAMK2A	0	0	0	1	0	0	0
sgACVR1_9_chr2:158634662-	ACVR1	0	0	0	0	1	0	0
sgWNK3_10_chrX:54228602+	WNK3	0	1	0	0	0	0	0
sgPKDCC_1_chr2:42275368-	PKDCC	562	0	281	0	0	0	2
sgMYLK_5_chr3:123339085+	MYLK	618	2	310	2	1	0	1
sgSGK3_4_chr8:67753320-	SGK3	14687	2556	8621	23128	27780	17501	24616
sgROCK2_1_chr2:11362275-	ROCK2	2	0	0	1	0	1	0
sgCHEK2_1_chr22:29095894-	CHEK2	505	1	253	1	0	0	1
sgDCLK1_10_chr13:36410206-	DCLK1	0	0	0	1	0	147	232
sgMAST4_1_chr5:66195782+	MAST4	5250	4371	4810	931	1017	1399	2170
sgZAK_1_chr2:173955864+	ZAK	0	0	0	0	1	0	0
sgSGK2_10_chr20:42204867-	SGK2	0	1	0	0	0	0	1
sgCAMKK2_10_chr12:121693589-	CAMKK2	723	7	365	253	294	736	1073
sgDYRK2_9_chr12:68052444+	DYRK2	0	2	0	1	1	302	485
sgBCR_7_chr22:23603685+	BCR	343	71	207	5	1	323	543
sgPINK1_5_chr1:20972112-	PINK1	0	0	0	0	0	0	0
sgRPS6KL1_9_chr14:75376813+	RPS6KL1	38639	45175	41907	18332	16364	11265	14699
sgROCK2_8_chr2:11484172-	ROCK2	0	0	0	1	0	0	0
sgSTK31_3_chr7:23792335+	STK31	9214	2644	5929	4065	4202	5462	7911
sgSTRADB_9_chr2:202334688-	STRADB	0	0	0	1	0	0	0
sgIKBKE_2_chr1:206650127-	IKBKE	0	0	0	0	0	0	0
sgADCK2_5_chr7:140373513-	ADCK2	1053	2149	1601	6	0	418	540
sgPIM3_5_chr22:50356400-	PIM3	4	3349	1676	3	0	11	3
sgPKN3_7_chr9:131469060+	PKN3	0	0	0	0	0	2	0
sgSTK3_10_chr8:99608330+	STK3	0	0	0	0	0	0	0
sgLMTK3_5_chr19:49013804+	LMTK3	0	2	0	155	205	0	1
sgCAMKK2_5_chr12:121712173+	CAMKK2	1	56	20	0	0	261	442
sgIRAK1_6_chrX:153285204+	IRAK1	0	0	0	0	1	0	0
sgPTK6_3_chr20:62165600-	PTK6	4144	4920	4532	2003	2025	6079	8173
sgMAST4_5_chr5:65892628+	MAST4	0	0	0	0	0	0	0
sgDSTYK_10_chr1:205156605-	DSTYK	0	2	0	0	0	2	2
sgPLK3_5_chr1:45269651+	PLK3	305	5	154	375	368	10	9
sgALPK3_5_chr15:85360476-	ALPK3	1228	1942	1585	310	304	375	629
sgMAST1_8_chr19:12958702-	MAST1	1635	610	1122	599	975	1217	1907
sgSRMS_10_chr20:62175653+	SRMS	0	0	0	1	0	1	1
sgPTK2_1_chr8:141727722-	PTK2	0	0	0	0	0	0	0
sgWNK3_5_chrX:54319343+	WNK3	442	1326	884	151	168	5	7
sgFASTK_1_chr7:150776034+	FASTK	1	0	0	0	0	0	0
sgHIPK1_3_chr1:114500819-	HIPK1	1	0	0	0	0	9	4
sgBRDT_5_chr1:92441968+	BRDT	1963	1782	1872	346	370	715	1189
sgSIK1_8_chr21:44840261+	SIK1	1254	973	1114	412	425	14	11
sgDYRK1A_2_chr21:38862559+	DYRK1A	1756	12	884	1038	1259	1342	2485
sgROCK2_5_chr2:11332625+	ROCK2	2489	3075	2782	511	573	16	24
sgFLT1_1_chr13:29068960+	FLT1	6959	6837	6898	5235	4993	3758	5242
sgTTN_9_chr2:179654094-	TTN	5742	3253	4497	853	939	2399	3778
sgSGK1_8_chr6:134494220+	SGK1	1	0	0	0	0	0	0
sgMAPK1_5_chr22:22160162+	MAPK1	17383	19848	18615	6619	6686	5642	7879
sgGAK_9_chr4:891860+	GAK	562	1494	1028	172	144	3	4
sgSGK196_6_chr8:42958798-	SGK196	0	0	0	0	0	0	0
sgBRAF_8_chr7:140500232-	BRAF	664	1	319	0	0	0	0
sgPDK4_8_chr7:95225484+	PDK4	0	3	0	0	0	0	0
sgNEK6_6_chr9:127083806+	NEK6	0	0	0	2	0	0	0
sgTNK2_7_chr3:195599162+	TNK2	469	1	235	1	5	548	816
sgTRPM6_1_chr9:77427241+	TRPM6	498	12	243	554	647	325	520
sgATM_7_chr11:108206642+	ATM	558	8	283	556	704	346	566
sgALPK2_5_chr18:56202923-	ALPK2	1353	4	678	996	901	429	571
sgEPHB6_8_chr7:142564713-	EPHB6	325	1952	1138	321	383	13	6
sgKIT_9_chr4:55564652-	KIT	0	0	0	256	202	0	2
sgCDKL3_5_chr5:133643939+	CDKL3	1961	2060	2010	2192	2116	1157	1759
sgSTK17B_8_chr2:197010723+	STK17B	1926	27	976	2542	2792	2839	4428
sgCDK20_4_chr9:90586169-	CDK20	0	0	0	1	3	0	0
sgSRMS_9_chr20:62178521-	SRMS	0	2	0	0	0	0	0
sgFGFR4_10_chr5:176519685+	FGFR4	243	1035	639	5	1	447	518
sgC9orf96_5_chr9:136260783+	C9orf96	7828	12044	9936	5290	5500	5870	8626
sgULK3_7_chr15:75131375-	ULK3	0	0	0	0	0	0	0
CTRL0087	CTRL0087	0	0	0	0	0	0	0
sgHIPK2_2_chr7:139416754+	HIPK2	3	0	0	0	0	0	0
sgKSR1_1_chr17:25909699+	KSR1	2759	4500	3629	1163	1340	1253	2179
sgPKN1_3_chr19:14561841-	PKN1	0	0	0	0	0	0	0
sgPNCK_2_chrX:152937400-	PNCK	573	0	320	0	0	0	2
sgFGFR1_3_chr8:38275471+	FGFR1	0	2	0	2	0	130	194
sgMAPK6_6_chr15:52339153+	MAPK6	2176	1626	1901	2779	2998	222	362
sgBTK_7_chrX:100608922-	BTK	531	2	224	242	344	257	449
sgLMTK3_4_chr19:49014803+	LMTK3	0	0	0	0	0	0	1
sgRPS6KA1_7_chr1:26888076+	RPS6KA1	966	1197	1081	69	124	365	665
sgSTK4_6_chr20:43623835+	STK4	4	0	0	0	4	1	0
sgNLK_6_chr17:26512208-	NLK	495	1321	908	783	872	170	260
sgCDKL4_2_chr2:39417479-	CDKL4	0	0	0	0	0	2	0
sgTGFBR1_9_chr9:101891277-	TGFBR1	5	2	0	7	1	365	545
sgPRKG2_3_chr4:82125933-	PRKG2	547	1	129	0	0	0	0
sgGRK6_5_chr5:176860157-	GRK6	0	0	0	0	1	0	0
sgDYRK3_4_chr1:206821173+	DYRK3	0	0	0	0	0	0	0
sgSRPK2_8_chr7:104782731-	SRPK2	0	0	0	0	0	0	4
sgMAP2K4_8_chr17:12032469-	MAP2K4	376	0	0	0	1	0	0
sgBMX_8_chrX:15568054-	BMX	244	5	124	680	715	1076	1524
sgCDK13_1_chr7:39990352-	CDK13	2	0	0	0	0	1	0
sgEPHA6_1_chr3:97194244-	EPHA6	8458	14574	11516	5844	5800	7169	10028
sgNTRK1_3_chr1:156837915-	NTRK1	694	3	330	332	276	644	833
sgSGK196_4_chr8:42958750+	SGK196	5	0	0	0	0	0	0
sgLATS1_5_chr6:150004885-	LATS1	1	3	0	345	370	324	528
sgRET_10_chr10:43601928+	RET	0	0	0	0	0	1	0
sgCDK14_6_chr7:90528623+	CDK14	0	0	0	1	0	0	2
sgMAPK15_2_chr8:144799877+	MAPK15	637	0	0	0	0	0	0
sgDDR1_10_chr6:30865309+	DDR1	1	1	0	1	0	215	303
CTRL0080	CTRL0080	5250	21	2635	1757	1848	3820	5547
sgBRSK1_6_chr19:55816056-	BRSK1	0	2	0	150	284	1	5
sgZAP70_2_chr2:98351041+	ZAP70	41	1	0	274	351	3	4
sgSTK25_7_chr2:242438499+	STK25	0	0	0	0	0	0	0
sgNEK10_6_chr3:27346394-	NEK10	0	0	0	0	0	0	0
sgERBB3_3_chr12:56477679-	ERBB3	1560	1036	1298	374	383	366	578
sgFGFR3_6_chr4:1803572+	FGFR3	0	0	0	2	0	0	0
sgMYLK4_1_chr6:2689131-	MYLK4	15650	19172	17411	12055	10249	7475	8935
sgBMX_6_chrX:15560194+	BMX	0	0	0	2	0	1	3
sgAURKB_6_chr17:8108638-	AURKB	1	0	0	0	0	0	0
sgMAP3K5_6_chr6:137112977-	MAP3K5	0	0	0	0	0	0	1
sgPHKG2_7_chr16:30768024-	PHKG2	2	0	0	0	0	0	0
sgDAPK1_6_chr9:90114022+	DAPK1	1158	16	582	1074	914	635	892
sgGSG2_6_chr17:3627683+	GSG2	1	0	0	0	0	0	0
sgEIF2AK4_3_chr15:40247957-	EIF2AK4	982	7	431	482	626	4	12
sgBMPR2_6_chr2:203242196+	BMPR2	534	0	129	0	0	0	0
sgSYK_5_chr9:93606228+	SYK	378	3171	1775	5	3	18	1
sgROCK2_7_chr2:11484225+	ROCK2	4	8	0	2	0	2	1
sgCDK5_4_chr7:150751546-	CDK5	3	1	0	1	1	0	0
sgTRIB3_8_chr20:371953-	TRIB3	8744	1792	5268	8561	12779	3715	6083
sgCSNK2A1_9_chr20:464621-	CSNK2A1	3929	1446	2687	2272	2386	2277	3323
sgNEK4_6_chr3:52804708-	NEK4	251	1492	817	1	0	6	3
sgWNK4_3_chr17:40947161-	WNK4	0	0	0	0	0	0	2
sgMAPK12_9_chr22:50699842-	MAPK12	402	1684	1043	955	980	355	530
sgPDK3_7_chrX:24512935+	PDK3	367	693	530	134	160	6	7
sgMASTL_2_chr10:27444350+	MASTL	607	0	310	2	0	0	2
sgPRKCZ_4_chr1:2103581-	PRKCZ	0	0	0	0	0	0	0
sgTAF1_4_chrX:70598214+	TAF1	465	1041	753	5	1	4	1
sgPRKCZ_7_chr1:2106721-	PRKCZ	0	0	0	0	0	0	0
sgSTK19_1_chr6:31939848+	STK19	2494	702	1598	1228	1663	578	953
sgPTK6_5_chr20:62165013-	PTK6	0	0	0	3	1	3	0
sgMAPK10_6_chr4:87022207-	MAPK10	446	0	221	0	1	0	1
sgMAP2K3_4_chr17:21203929+	MAP2K3	0	0	0	0	0	0	0
sgPRKCD_4_chr3:53220022+	PRKCD	0	1	0	2	1	3	1
sgNEK6_3_chr9:127064300-	NEK6	254	21	0	101	274	68	186
sgPRKD1_9_chr14:30396516+	PRKD1	4	0	0	0	0	0	0
sgAXL_6_chr19:41737113-	AXL	608	1801	1205	277	266	12	15
sgERBB4_1_chr2:213403206-	ERBB4	11782	9655	10781	15327	17063	12729	19302
sgSTK3_9_chr8:99560224-	STK3	546	4	275	932	1069	14	15
sgMET_7_chr7:116339152-	MET	663	2028	1345	219	193	8	5
sgEPHA10_5_chr1:38230692+	EPHA10	10	2346	1178	195	200	12	2
sgMAPK7_6_chr17:19285199+	MAPK7	88	18	53	115	168	38	60
sgRNASEL_9_chr1:182554799-	RNASEL	0	0	0	0	0	0	0
sgMAPK4_9_chr18:48252446-	MAPK4	0	0	0	0	0	0	0
sgDCLK2_1_chr4:151000217+	DCLK2	652	5	328	682	632	7	7
sgSTK11_5_chr19:1220448+	STK11	1	0	0	0	0	0	0
sgNTRK1_6_chr1:156838412+	NTRK1	3	3	0	2	1	4	8
sgSTK31_10_chr7:23776667+	STK31	2679	7886	5283	610	663	56	10
sgTRIM33_3_chr1:115053427-	TRIM33	0	0	0	0	0	0	0
sgWNK2_5_chr9:95947280-	WNK2	17600	17713	17658	11069	12036	7236	10605
sgTSSK3_3_chr1:32828336+	TSSK3	9151	6373	7726	9220	9159	8842	12074
sgNEK3_9_chr13:52709919+	NEK3	87	1	0	1	0	9	42
sgPTK6_9_chr20:62165494+	PTK6	341	0	139	0	1	1	0
sgMATK_8_chr19:3783142-	MATK	0	0	0	0	0	0	0
sgIKBKE_5_chr1:206651643-	IKBKE	5	5	0	237	336	2	6
sgSTK36_9_chr2:219562236-	STK36	0	0	0	1	0	0	0
sgSTK31_9_chr7:23775413+	STK31	11745	8496	10140	4855	4737	1590	2248
sgPAK3_1_chrX:110385394+	PAK3	0	0	0	0	0	0	0
sgNEK9_7_chr14:75553857+	NEK9	295	30	162	1808	1714	298	311
sgSGK2_6_chr20:42195751-	SGK2	0	0	0	0	0	1	0
sgSTK32C_7_chr10:134037928-	STK32C	1036	3198	2118	1184	1157	24	28
sgTEC_10_chr4:48147137-	TEC	1184	1661	1443	466	446	167	232
sgTSSK6_9_chr19:19625429-	TSSK6	1669	945	1309	2093	2133	248	312
sgSTK32B_7_chr4:5170088+	STK32B	0	956	478	345	308	7	6
sgCDC42BPA_4_chr1:227222453-	CDC42BPA	0	1	0	0	0	0	0
sgSBK2_6_chr19:56047490-	SBK2	1855	1560	1707	1733	1955	987	1418
sgARAF_7_chrX:47424718-	ARAF	0	2	0	0	0	0	0
sgCDKL3_6_chr5:133702195-	CDKL3	846	2365	1605	268	336	24	13
sgSTK32B_2_chr4:5170126+	STK32B	0	0	0	1	0	0	0
sgMKNK1_4_chr1:47037780-	MKNK1	1773	2784	2288	1294	1129	2007	2283
sgCSNK1E_10_chr22:38695924-	CSNK1E	1874	1573	1732	206	219	302	474
sgHIPK1_7_chr1:114511121-	HIPK1	2	0	0	0	0	0	0
sgTP53RK_3_chr20:45317988+	TP53RK	0	0	0	1	0	0	0
sgMST1R_3_chr3:49940923+	MST1R	0	0	0	0	0	0	0
sgPDGFRB_5_chr5:149509428-	PDGFRB	3230	3703	3466	1659	1989	1412	2080
sgSNRK_7_chr3:43381849-	SNRK	10084	3329	6707	9393	9897	3889	5607
sgPDK2_7_chr17:48184161-	PDK2	248	2	0	0	0	0	2
sgTGFBR2_1_chr3:30713198-	TGFBR2	0	0	0	0	1	0	0
sgCAMK2B_8_chr7:44281806+	CAMK2B	0	0	0	0	0	0	0
sgSCYL2_8_chr12:100711689-	SCYL2	107	0	0	19	80	31	145
sgPIK3R4_1_chr3:130425826+	PIK3R4	1800	1535	1667	1582	1654	646	870
sgNTRK2_9_chr9:87285785-	NTRK2	3073	9	1541	711	741	9	31
sgMATK_6_chr19:3784177-	MATK	0	0	0	0	0	0	0
sgMOS_8_chr8:57025569-	MOS	4865	3237	4051	2864	3188	511	760
sgMET_6_chr7:116395461+	MET	457	0	229	219	262	0	4
sgTTBK1_10_chr6:43250816+	TTBK1	0	0	0	5	6	0	0
sgHSPB8_7_chr12:119617310+	HSPB8	0	0	0	1	0	0	0
sgCDC42BPG_4_chr11:64597092-	CDC42BPG	351	10	180	752	764	623	860
sgEPHA2_3_chr1:16475080-	EPHA2	1314	1	657	1	2	3	2
sgMAPK9_10_chr5:179707459-	MAPK9	1488	12	750	1098	1345	2380	3861
sgPNCK_1_chrX:152938507-	PNCK	2	1	0	0	0	418	560
sgTLK1_9_chr2:171906359-	TLK1	0	152	76	130	130	2	5
sgPHKG1_5_chr7:56151399-	PHKG1	112	1	65	0	0	0	1
sgAURKC_3_chr19:57743544+	AURKC	3163	2913	3038	620	550	1839	2400
sgMAP3K10_4_chr19:40698030+	MAP3K10	0	0	0	0	0	0	1
sgTAOK1_3_chr17:27822682+	TAOK1	0	0	0	1	3	220	460
sgEIF2AK4_8_chr15:40268900-	EIF2AK4	0	0	0	0	1	0	0
sgZAP70_9_chr2:98354518-	ZAP70	1277	128	703	123	158	162	278
sgSRPK1_4_chr6:35838181-	SRPK1	2923	1760	2343	572	615	1101	1824
sgTRIO_1_chr5:14143829+	TRIO	2219	3540	2789	829	738	497	601
sgMAP2K6_3_chr17:67517220+	MAP2K6	0	2	1	83	134	3	0
sgILK_10_chr11:6631406+	ILK	698	4	351	4	1	894	1073
sgDMPK_10_chr19:46281821-	DMPK	0	0	0	0	0	0	0
sgEPHB4_1_chr7:100421437-	EPHB4	1404	5000	3202	300	273	453	539
sgCDK10_5_chr16:89757860-	CDK10	0	0	0	0	0	2	2
sgRPS6KA3_2_chrX:20252896-	RPS6KA3	1174	21	601	953	1063	1030	1666
sgMAPK13_1_chr6:36106672+	MAPK13	1	2	0	5	1	1	4
sgCDK19_3_chr6:110942467-	CDK19	0	0	0	0	0	0	0
sgMTOR_8_chr1:11307909+	MTOR	8604	6030	7317	1365	1246	2806	3573
sgCSNK1G1_1_chr15:64592647-	CSNK1G1	3	1166	585	2	2	0	3
sgLATS1_7_chr6:150023240-	LATS1	0	0	0	2	0	0	0
sgEGFR_5_chr7:55211061+	EGFR	0	0	0	0	0	0	0
sgGUCY2C_7_chr12:14832646-	GUCY2C	0	11	0	0	0	0	0
sgMTOR_4_chr1:11318559-	MTOR	0	1	0	0	0	0	0
sgPNCK_6_chrX:152938136-	PNCK	0	0	0	0	0	0	0
sgEPHA3_6_chr3:89259489+	EPHA3	1196	4	600	288	287	164	240
sgCDC42BPA_6_chr1:227441767-	CDC42BPA	4	1	0	0	3	289	922
sgTGFBR2_6_chr3:30713392+	TGFBR2	8	0	4	0	2	2	0
sgFER_2_chr5:108203469+	FER	0	0	0	0	1	0	0
sgGUCY2D_6_chr17:7910008+	GUCY2D	0	0	0	0	0	0	0
sgGRK7_5_chr3:141497482-	GRK7	0	30	0	0	0	0	0
sgBRD4_1_chr19:15375354-	BRD4	0	0	0	0	0	0	0
sgGRK7_3_chr3:141497330-	GRK7	0	0	0	0	0	24	68
sgAXL_4_chr19:41727119-	AXL	0	0	0	0	0	0	0
sgPRKCA_6_chr17:64738803+	PRKCA	294	1748	1021	3	0	8	2
sgCDK20_2_chr9:90589328-	CDK20	3	0	0	1	0	357	508
sgWNK1_2_chr12:862952-	WNK1	0	0	0	0	0	0	0
sgMYLK3_7_chr16:46771644-	MYLK3	2230	2027	2129	1238	1111	1668	1987
sgLIMK1_1_chr7:73521430-	LIMK1	0	0	0	1	1	0	1
sgPRKG1_3_chr10:52913002+	PRKG1	9463	8127	8795	2484	2472	1626	2322
sgULK3_6_chr15:75131677-	ULK3	223	9	116	134	315	4	8
sgMAP3K4_2_chr6:161494510+	MAP3K4	464	1	230	0	0	0	0
sgDYRK1B_4_chr19:40322447-	DYRK1B	1321	3167	2244	339	311	1792	2339
sgMAPKAPK3_2_chr3:50679751-	MAPKAPK3	0	0	0	0	0	0	0
sgEPHB1_4_chr3:134670386-	EPHB1	227	0	114	18	81	10	70
sgTGFBR2_4_chr3:30648409-	TGFBR2	879	2326	1603	142	120	803	957
sgSGK223_6_chr8:8234574-	SGK223	1634	17	853	449	520	2256	3468
CTRL0024	CTRL0024	1	1733	867	1	3	386	477
sgWNK1_5_chr12:863346+	WNK1	7	2	0	0	0	0	0
sgROR2_3_chr9:94519713-	ROR2	3	6	0	0	0	0	1
sgBLK_2_chr8:11400766+	BLK	1910	22	966	1016	1390	1122	1874
sgNEK10_3_chr3:27387644-	NEK10	0	0	0	0	0	0	0
sgBRAF_2_chr7:140500158+	BRAF	5733	5459	5596	1221	1267	1530	2282
sgLIMK1_7_chr7:73513525-	LIMK1	0	1	0	0	0	0	0
sgBMPR2_10_chr2:203417498+	BMPR2	0	20	0	0	0	0	0
sgYES1_9_chr18:747942+	YES1	15	3389	1702	2	0	340	473
sgPRKD2_1_chr19:47197363-	PRKD2	582	3	239	560	669	202	306
sgBUB1_7_chr2:111419217+	BUB1	0	0	0	0	0	0	0
sgKSR1_8_chr17:25917833+	KSR1	2	2	0	636	746	6	13
sgPTK7_7_chr6:43113044+	PTK7	0	0	0	0	0	1	0
sgMAP2K5_9_chr15:67923224+	MAP2K5	4	2	0	313	325	2	10
sgPRKACB_6_chr1:84668436-	PRKACB	0	0	0	0	0	0	0
sgCSNK1G2_3_chr19:1978612-	CSNK1G2	2	1	0	0	0	0	0
sgDCLK3_10_chr3:36779490-	DCLK3	0	0	0	1	0	0	0
sgSTK11_1_chr19:1206933+	STK11	724	1	36	1	0	0	0
sgMAP3K5_10_chr6:136990454+	MAP3K5	1540	3648	2594	1415	1352	451	668
sgDYRK3_3_chr1:206821105+	DYRK3	1973	8	990	268	289	340	574
sgCDKL5_6_chrX:18643312+	CDKL5	556	984	770	3	1	4	2
sgALPK3_9_chr15:85383678-	ALPK3	0	0	0	0	0	0	0
sgKSR1_3_chr17:25931733+	KSR1	436	1	218	1	1	0	0
sgLRRK2_3_chr12:40645321+	LRRK2	1	1057	529	1	1	6	1
sgIRAK2_6_chr3:10261380-	IRAK2	0	0	0	1	0	0	0
sgCDK15_5_chr2:202712176+	CDK15	678	1	340	313	345	382	551
sgIKBKB_7_chr8:42147696+	IKBKB	2	0	1	1	4	0	0
sgPIM3_4_chr22:50355329-	PIM3	1281	4754	3018	450	383	534	625
sgULK3_9_chr15:75135333+	ULK3	326	0	163	3	1	496	599
sgFLT3_2_chr13:28636164+	FLT3	0	1	0.5	2	1	2	1
sgADCK5_7_chr8:145603107+	ADCK5	658	1	330	0	0	0	0
sgTXK_2_chr4:48081975-	TXK	1090	1	546	0	0	0	2
sgALK_7_chr2:30143084-	ALK	1	0	0	0	0	0	0
sgCSNK2A2_2_chr16:58220705-	CSNK2A2	657	1028	843	501	610	447	790
sgMYLK2_5_chr20:30408277+	MYLK2	1391	2255	1823	785	677	1822	2454
sgFGFR2_1_chr10:123310884-	FGFR2	1	1	0	0	0	0	0
sgSTK19_8_chr6:31940163-	STK19	1	0	0	0	1	0	1
sgIRAK2_1_chr3:10206667-	IRAK2	0	0	0	0	0	0	1
sgPAK4_3_chr19:39664607+	PAK4	3675	4982	4330	483	486	445	522
sgRPS6KA4_10_chr11:64129182+	RPS6KA4	0	0	0	0	0	0	0
sgVRK2_4_chr2:58362319-	VRK2	0	0	0	0	0	0	1
sgCDK5_5_chr7:150754161-	CDK5	2	1	0	2	0	149	269
sgPAK4_1_chr19:39664391-	PAK4	3	3549	1776	9	0	14	2
sgTRRAP_5_chr7:98506495+	TRRAP	3785	6	1899	82	106	2272	3370
sgSIK3_9_chr11:116729991-	SIK3	13934	13474	13704	3612	3361	5496	7200
sgPRKCQ_8_chr10:6557069+	PRKCQ	0	0	0	0	0	0	0
sgCDK4_4_chr12:58145401+	CDK4	156	3	0	202	230	403	867
sgPTK2_5_chr8:141711017-	PTK2	2	0	1	0	0	0	0
sgEPHB1_6_chr3:134825351+	EPHB1	0	0	0	0	1	0	0
sgGRK1_9_chr13:114321771+	GRK1	0	0	0	0	1	0	1
sgKALRN_10_chr3:123987781+	KALRN	313	1	157	0	1	0	3
sgNUAK1_2_chr12:106466511-	NUAK1	1201	6	603	1	0	1	2
sgBUB1B_4_chr15:40475951+	BUB1B	4	1	0	2	4	2	1
sgNEK5_10_chr13:52657398-	NEK5	1	0	0	0	0	0	0
sgTESK2_1_chr1:45923381-	TESK2	828	0	0	0	0	0	2
sgADRBK2_4_chr22:26100151+	ADRBK2	1	0	0	0	0	0	0
sgPXK_3_chr3:58318769+	PXK	0	1	0	0	0	0	0
sgIRAK4_10_chr12:44166054-	IRAK4	202	12	105	1366	3072	573	1478
sgEPHA7_8_chr6:93955139+	EPHA7	1067	14	550	952	1311	704	1176
sgPDK1_3_chr2:173451087-	PDK1	1	2	0	1	10	6	14
sgKIT_8_chr4:55564592+	KIT	440	737	598	3	1	7	0
sgCDC42BPG_1_chr11:64606274-	CDC42BPG	3792	3738	3765	1533	1799	654	1003
sgSTK31_4_chr7:23808638+	STK31	2333	1730	2033	864	971	34	28
sgNEK7_7_chr1:198248117-	NEK7	3	555	279	507	573	7	12
sgEIF2AK1_9_chr7:6084268+	EIF2AK1	11050	6112	8581	3556	3759	7665	10209
sgPLK2_1_chr5:57751568-	PLK2	4342	2064	3203	1541	1717	399	612
sgMAPKAPK3_10_chr3:50677801+	MAPKAPK3	577	1	289	1	1	0	2
sgHSPB8_2_chr12:119617290-	HSPB8	638	14	326	597	585	1161	1446
sgRPS6KA1_3_chr1:26879875+	RPS6KA1	1290	67	688	2277	4649	1363	2834
sgSCYL3_7_chr1:169831756-	SCYL3	0	0	0	0	0	0	0
sgALK_4_chr2:30143473+	ALK	0	0	0	0	0	0	1
sgAKT2_5_chr19:40741229-	AKT2	832	0	416	2	0	0	2
sgSBK1_10_chr16:28328849-	SBK1	296	12	154	283	304	1279	1874
sgKDR_6_chr4:55974036+	KDR	0	0	0	0	1	0	0
sgPKMYT1_6_chr16:3024580-	PKMYT1	1	0	0	0	0	0	0
sgTYK2_9_chr19:10467329+	TYK2	605	0	3	0	1	0	2
sgGRK7_1_chr3:141497200+	GRK7	0	0	0	0	0	0	0
sgSPEG_10_chr2:220329211+	SPEG	553	456	505	409	473	601	839
sgEPHA1_9_chr7:143090900+	EPHA1	845	404	624	1	0	7	0
sgPKN3_4_chr9:131467698-	PKN3	0	0	0	0	0	0	0
sgMAP3K15_1_chrX:19533371-	MAP3K15	0	0	0	0	0	0	0
sgLTK_1_chr15:41804345-	LTK	489	1	245	301	337	3	5
sgERBB4_3_chr2:212251642+	ERBB4	570	1	0	0	4	307	490
sgNRBP2_7_chr8:144919862+	NRBP2	508	1242	875	379	491	8	8
sgTRPM6_3_chr9:77390838+	TRPM6	730	1	0	0	0	0	0
sgSTK35_4_chr20:2082536-	STK35	0	0	0	0	0	0	1
sgADCK4_8_chr19:41215981-	ADCK4	0	0	0	0	1	0	0
sgPTK6_7_chr20:62168511-	PTK6	0	0	0	4	0	0	1
sgTNK1_10_chr17:7290409+	TNK1	30601	24636	27681	17750	14096	22580	25316
sgTNNI3K_7_chr1:74901782+	TNNI3K	703	6	0	10	1	1	3
sgKIAA1804_2_chr1:233464369+	KIAA1804	4	0	0	0	0	1	0
sgBMPR1A_7_chr10:88683119+	BMPR1A	1002	3	0	198	256	3	2
sgPBK_6_chr8:27685647-	PBK	0	0	0	1	1	0	0
sgPRKCZ_1_chr1:2082381+	PRKCZ	0	0	0	1	0	0	0
sgDDR1_5_chr6:30857186+	DDR1	222	1	1	214	275	2	10
sgBLK_6_chr8:11414279+	BLK	340	1821	1180	7	1	190	278
sgMARK4_7_chr19:45754872-	MARK4	1	0	0	1	0	0	0
sgLRRK1_9_chr15:101523825+	LRRK1	7	9	3	475	387	763	841
sgNRK_5_chrX:105066873+	NRK	2886	30	1458	2339	2033	1317	1738
sgCSNK1G2_8_chr19:1979034+	CSNK1G2	697	10	342	631	609	941	1307
sgACVRL1_2_chr12:52307066-	ACVRL1	691	1	0	0	0	0	0
sgFLT3_7_chr13:28636131-	FLT3	0	0	0	0	0	0	0
sgPRKX_6_chrX:3573224-	PRKX	4005	4526	4265	602	653	1478	2191
sgRIOK2_9_chr5:96506925+	RIOK2	0	0	0	0	0	0	0
sgMST1R_7_chr3:49940347+	MST1R	6988	12825	9910	37	21	2674	3630
sgCDK18_7_chr1:205493473-	CDK18	0	1	0	0	0	0	0
sgTNIK_6_chr3:170858217-	TNIK	0	2	1	0	0	0	0
sgTP53RK_5_chr20:45317924-	TP53RK	0	1835	520	2	0	7	3
sgDYRK4_8_chr12:4705365+	DYRK4	534	876	705	227	314	269	464
sgEPHA10_6_chr1:38230678+	EPHA10	0	0	0	0	0	0	0
sgWNK2_6_chr9:95947285+	WNK2	0	0	0	0	0	0	0
sgMAP2K4_1_chr17:11998888+	MAP2K4	0	93	0	0	0	0	0
sgDYRK1B_10_chr19:40322460+	DYRK1B	0	0	0	0	0	0	0
sgCAMKK1_1_chr17:3788827+	CAMKK1	0	0	0	0	0	0	1
sgSGK196_10_chr8:42958847-	SGK196	0	0	0	0	0	0	1
sgTESK1_5_chr9:35607591+	TESK1	908	3129	2019	607	664	382	497
sgEPHA10_10_chr1:38227227-	EPHA10	1	0	0	2	0	114	159
sgCDC42BPB_4_chr14:103438333-	CDC42BPB	1123	2108	1729	309	292	688	937
sgMAST4_7_chr5:65892825+	MAST4	0	0	0	0	0	0	0
sgMAP3K19_6_chr2:135756310-	MAP3K19	1938	1246	1592	337	328	904	1536
sgCAMK2G_4_chr10:75608814+	CAMK2G	380	2	191	148	274	2	8
sgMAP3K5_2_chr6:137113206+	MAP3K5	0	1	0	6	4	359	508
sgBRSK1_1_chr19:55798601-	BRSK1	1484	716	1100	214	260	669	1264
sgBMP2K_8_chr4:79793879-	BMP2K	1012	2	507	256	298	575	1028
sgRIPK4_1_chr21:43187151+	RIPK4	1	0	0	0	1	0	2
sgBRD4_3_chr19:15376349+	BRD4	0	0	0	0	0	0	0
sgPRKD1_3_chr14:30135359+	PRKD1	4553	3537	4045	7973	7943	1964	2887
sgTRIM33_10_chr1:115053327+	TRIM33	0	0	0	0	0	0	0
sgMYLK2_4_chr20:30408257+	MYLK2	0	0	0	0	0	0	0
sgPDPK1_7_chr16:2636873+	PDPK1	888	946	917	18	19	4	1
sgBRD4_8_chr19:15383817-	BRD4	431	1	216	1	0	0	1
sgMKNK1_7_chr1:47030713+	MKNK1	0	0	0	1	0	0	0
sgMAP2K5_6_chr15:68061940+	MAP2K5	1	1	1	0	0	0	1
sgRIOK1_1_chr6:7390247+	RIOK1	0	0	0	0	0	0	1
sgEPHA5_3_chr4:66356142-	EPHA5	270	4	137	898	1076	23	24
sgGRK4_2_chr4:3021519+	GRK4	6800	10203	8580	2118	2256	2725	4230
sgCDK12_7_chr17:37646906-	CDK12	3	5	0	1	2	0	1
sgFGFR2_6_chr10:123244979-	FGFR2	19	1	0	0	1	14	127
sgMAP3K8_4_chr10:30747135-	MAP3K8	0	0	0	0	0	0	0
sgMAP3K2_9_chr2:128075848-	MAP3K2	0	0	0	0	0	0	0
sgSTK17B_3_chr2:197027988-	STK17B	0	0	0	0	0	0	0
sgPRKG2_8_chr4:82027067+	PRKG2	0	0	0	0	0	0	0
sgACVR1B_4_chr12:52370345-	ACVR1B	0	0	0	0	0	0	0
sgTSSK4_3_chr14:24675790+	TSSK4	0	0	0	0	0	0	0
sgCDK20_1_chr9:90588860+	CDK20	0	0	0	0	0	0	0
sgPLK4_7_chr4:128807276-	PLK4	0	0	0	0	0	0	0
sgNTRK1_1_chr1:156838432-	NTRK1	0	0	0	0	0	0	0
sgRAF1_5_chr3:12645713+	RAF1	0	0	0	0	0	0	0
sgRIPK3_3_chr14:24807630+	RIPK3	0	0	0	0	0	0	0
sgGRK7_9_chr3:141499259+	GRK7	0	0	0	0	0	0	0
sgMAST2_8_chr1:46498281+	MAST2	0	0	0	0	0	0	0
sgINSRR_7_chr1:156821429+	INSRR	0	0	0	0	0	0	0
sgPRKCH_2_chr14:61788933-	PRKCH	0	0	0	0	0	0	0
sgDAPK3_7_chr19:3964287-	DAPK3	0	0	0	0	0	0	0
sgCSNK1G2_1_chr19:1969792+	CSNK1G2	0	0	0	0	0	0	0
sgDYRK1B_1_chr19:40322476+	DYRK1B	0	0	0	0	0	0	0
sgSYK_6_chr9:93606254+	SYK	0	0	0	0	0	0	0
sgMYO3B_5_chr2:171242749-	MYO3B	0	0	0	0	0	0	0
sgNEK8_4_chr17:27064476-	NEK8	0	0	0	0	0	0	0
sgTAOK3_8_chr12:118599802-	TAOK3	0	0	0	0	0	0	0
sgGRK5_1_chr10:121201533-	GRK5	0	0	0	0	0	0	0
sgFES_5_chr15:91435969+	FES	0	0	0	0	0	0	0
sgCSNK2A1_7_chr20:472993-	CSNK2A1	0	0	0	0	0	0	0
sgRIPK2_2_chr8:90770346+	RIPK2	0	0	0	0	0	0	0
sgMARK2_6_chr11:63672268-	MARK2	0	0	0	0	0	0	0
sgPDPK1_9_chr16:2636837+	PDPK1	0	0	0	0	0	0	0
sgMAPK6_4_chr15:52338721+	MAPK6	0	0	0	0	0	0	0
sgSTK38L_1_chr12:27455073+	STK38L	0	0	0	0	0	0	0
sgKDR_1_chr4:55984887-	KDR	0	0	0	0	0	0	0
sgMOK_8_chr14:102732210-	MOK	0	0	0	0	0	0	0
sgSMG1_6_chr16:18848639-	SMG1	0	0	0	0	0	0	0
sgNUAK1_3_chr12:106464649+	NUAK1	0	0	0	0	0	0	0
sgTAF1L_6_chr9:32635197-	TAF1L	0	0	0	0	0	0	0
sgSTK24_7_chr13:99127191-	STK24	0	0	0	0	0	0	0
sgVRK1_1_chr14:97321630+	VRK1	0	0	0	0	0	0	0
sgCDK5_7_chr7:150754197-	CDK5	0	0	0	0	0	0	0
sgINSRR_5_chr1:156821948-	INSRR	0	0	0	0	0	0	0
sgLRRK2_5_chr12:40672022+	LRRK2	0	0	0	0	0	0	0
sgILK_7_chr11:6629974+	ILK	0	0	0	0	0	0	0
sgSTK36_6_chr2:219549915-	STK36	0	0	0	0	0	0	0
sgSTK32A_7_chr5:146657721+	STK32A	0	0	0	0	0	0	0
sgTRIO_8_chr5:14358415+	TRIO	0	0	0	0	0	0	0
sgCSNK1G3_7_chr5:122927004+	CSNK1G3	0	0	0	0	0	0	0
sgBTK_6_chrX:100611842-	BTK	0	0	0	0	0	0	0
sgUHMK1_1_chr1:162470803-	UHMK1	0	0	0	0	0	0	0
sgCDK14_10_chr7:90741914+	CDK14	0	0	0	0	0	0	0
sgRPS6KL1_3_chr14:75388034-	RPS6KL1	0	0	0	0	0	0	0
sgPASK_6_chr2:242079999+	PASK	0	0	0	0	0	0	0
sgACVR1C_9_chr2:158443687+	ACVR1C	0	0	0	0	0	0	0
sgTBK1_10_chr12:64889341+	TBK1	0	0	0	0	0	0	0
sgTNK2_6_chr3:195610045+	TNK2	0	0	0	0	0	0	0
sgCSK_2_chr15:75091235+	CSK	0	0	0	0	0	0	0
sgCDK11A_1_chr1:1647820-	CDK11A	0	0	0	0	0	0	0
sgFGFR1_6_chr8:38279429-	FGFR1	0	0	0	0	0	0	0
sgDAPK3_8_chr19:3963879-	DAPK3	0	0	0	0	0	0	0
sgTRPM7_3_chr15:50906429+	TRPM7	0	0	0	0	0	0	0
sgMAPKAPK2_10_chr1:206903351-	MAPKAPK2	0	0	0	0	0	0	0
sgNUAK1_5_chr12:106532260-	NUAK1	0	0	0	0	0	0	0
sgHIPK4_6_chr19:40889731+	HIPK4	0	0	0	0	0	0	0
sgHSPB8_10_chr12:119617162-	HSPB8	0	0	0	0	0	0	0
sgMAP3K10_7_chr19:40711901+	MAP3K10	0	0	0	0	0	0	0
sgMAPK14_1_chr6:36020556+	MAPK14	0	0	0	0	0	0	0
sgCAMK1D_6_chr10:12867568+	CAMK1D	0	0	0	0	0	0	0
sgMAP2K2_5_chr19:4102392-	MAP2K2	0	0	0	0	0	0	0
sgTRIB2_4_chr2:12863597-	TRIB2	0	0	0	0	0	0	0
sgNPR2_6_chr9:35805555+	NPR2	0	0	0	0	0	0	0
sgPAK3_8_chrX:110439739+	PAK3	0	0	0	0	0	0	0
sgCDK18_4_chr1:205492646-	CDK18	0	0	0	0	0	0	0
sgCIT_10_chr12:120198790-	CIT	0	0	0	0	0	0	0
sgPAK7_1_chr20:9561247-	PAK7	0	0	0	0	0	0	0
sgMAPKAPK5_8_chr12:112308936-	MAPKAPK5	0	0	0	0	0	0	0
sgPAK6_7_chr15:40566397-	PAK6	0	0	0	0	0	0	0
sgRNASEL_3_chr1:182554858+	RNASEL	0	0	0	0	0	0	0
sgCASK_8_chrX:41413096+	CASK	0	0	0	0	0	0	0
sgBCR_8_chr22:23610677-	BCR	0	0	0	0	0	0	0
sgNEK11_10_chr3:130828744+	NEK11	0	0	0	0	0	0	0
CTRL0094	CTRL0094	0	0	0	0	0	0	0
sgFLT3_3_chr13:28636060+	FLT3	0	0	0	0	0	0	0
sgCAMKV_2_chr3:49898896+	CAMKV	0	0	0	0	0	0	0
sgTYRO3_9_chr15:41862475-	TYRO3	0	0	0	0	0	0	0
sgPRKCG_7_chr19:54395858-	PRKCG	0	0	0	0	0	0	0
sgYES1_6_chr18:743374+	YES1	0	0	0	0	0	0	0
sgPRKACB_9_chr1:84662404+	PRKACB	0	0	0	0	0	0	0
sgADCK5_5_chr8:145618012-	ADCK5	0	0	0	0	0	0	0
sgNTRK1_10_chr1:156844736-	NTRK1	0	0	0	0	0	0	0
sgINSRR_2_chr1:156818756-	INSRR	0	0	0	0	0	0	0
sgPDK4_10_chr7:95221832-	PDK4	0	0	0	0	0	0	0
sgMAK_4_chr6:10775659-	MAK	0	0	0	0	0	0	0
sgPTK2_3_chr8:141712671-	PTK2	0	0	0	0	0	0	0
CTRL0026	CTRL0026	0	0	0	0	0	0	0
sgSLK_2_chr10:105761234+	SLK	0	0	0	0	0	0	0
sgCSNK2A1_3_chr20:469324-	CSNK2A1	0	0	0	0	0	0	0
sgMARK3_4_chr14:103871410+	MARK3	0	0	0	0	0	0	0
sgRIOK1_9_chr6:7401254+	RIOK1	0	0	0	0	0	0	0
sgPRKG1_1_chr10:53822370+	PRKG1	0	0	0	0	0	0	0
sgTRIB3_10_chr20:368686+	TRIB3	0	0	0	0	0	0	0
sgSTK19_3_chr6:31946678+	STK19	0	0	0	0	0	0	0
sgSTK16_6_chr2:220111555+	STK16	0	0	0	0	0	0	0
sgTRIM24_9_chr7:138223431+	TRIM24	0	0	0	0	0	0	0
sgTAF1_8_chrX:70621476+	TAF1	0	0	0	0	0	0	0
sgSGK494_8_chr17:26940653-	SGK494	0	0	0	0	0	0	0
sgEIF2AK3_8_chr2:88926491-	EIF2AK3	0	0	0	0	0	0	0
sgHUNK_2_chr21:33297038+	HUNK	0	0	0	0	0	0	0
sgACVR2B_3_chr3:38495837-	ACVR2B	0	0	0	0	0	0	0
sgFES_7_chr15:91437021-	FES	0	0	0	0	0	0	0
sgERN2_5_chr16:23718365+	ERN2	0	0	0	0	0	0	0
sgKDR_2_chr4:55991383+	KDR	0	0	0	0	0	0	0
sgWEE1_8_chr11:9608102+	WEE1	0	0	0	0	0	0	0
sgPASK_4_chr2:242080060-	PASK	0	0	0	0	0	0	0
sgMAP2K6_1_chr17:67513685+	MAP2K6	0	0	0	0	0	0	0
sgCDKL1_7_chr14:50807783-	CDKL1	0	0	0	0	0	0	0
sgLATS1_1_chr6:150005536-	LATS1	0	0	0	0	0	0	0
sgSIK3_2_chr11:116767953+	SIK3	0	0	0	0	0	0	0
sgCSK_8_chr15:75090968-	CSK	0	0	0	0	0	0	0
sgEPHA7_10_chr6:94120436-	EPHA7	0	0	0	0	0	0	0
sgALK_6_chr2:30143323+	ALK	0	0	0	0	0	0	0
sgPRKAA1_2_chr5:40767757-	PRKAA1	0	0	0	0	0	0	0
sgRPS6KA1_8_chr1:26881655+	RPS6KA1	0	0	0	0	0	0	0
sgROR1_5_chr1:64515489+	ROR1	0	0	0	0	0	0	0
sgLATS1_6_chr6:150004347-	LATS1	0	0	0	0	0	0	0
sgLMTK3_8_chr19:49012723-	LMTK3	0	0	0	0	0	0	0
sgULK1_4_chr12:132379578-	ULK1	0	0	0	0	0	0	0
sgMAPK14_10_chr6:36043668+	MAPK14	0	0	0	0	0	0	0
sgMARK1_3_chr1:220808833+	MARK1	0	0	0	0	0	0	0
sgLRRK2_1_chr12:40619032+	LRRK2	0	0	0	0	0	0	0
sgSRPK2_1_chr7:104807872-	SRPK2	0	0	0	0	0	0	0
sgMYLK_4_chr3:123337586+	MYLK	0	0	0	0	0	0	0
sgLMTK3_9_chr19:49012156-	LMTK3	0	0	0	0	0	0	0
sgPAK4_2_chr19:39664505-	PAK4	0	0	0	0	0	0	0
sgPIM1_10_chr6:37139123+	PIM1	0	0	0	0	0	0	0
sgMAP2K7_6_chr19:7975912-	MAP2K7	0	0	0	0	0	0	0
sgDAPK1_7_chr9:90219974+	DAPK1	0	0	0	0	0	0	0
sgSTK10_7_chr5:171583777-	STK10	0	0	0	0	0	0	0
sgCHEK1_7_chr11:125503065+	CHEK1	0	0	0	0	0	0	0
sgNUAK2_2_chr1:205290561-	NUAK2	0	0	0	0	0	0	0
sgPTK2B_8_chr8:27294992+	PTK2B	0	0	0	0	0	0	0
sgCAMK1G_8_chr1:209783236+	CAMK1G	0	0	0	0	0	0	0
sgILK_1_chr11:6625568+	ILK	0	0	0	0	0	0	0
sgIGF1R_1_chr15:99460028+	IGF1R	0	0	0	0	0	0	0
CTRL0085	CTRL0085	0	0	0	0	0	0	0
sgSTRADB_4_chr2:202337728-	STRADB	0	0	0	0	0	0	0
sgEPHA3_5_chr3:89259293-	EPHA3	0	0	0	0	0	0	0
sgTRIO_2_chr5:14280430+	TRIO	0	0	0	0	0	0	0
sgFRK_8_chr6:116288764-	FRK	0	0	0	0	0	0	0
sgPEAK1_5_chr15:77450964-	PEAK1	0	0	0	0	0	0	0
sgMAPK15_8_chr8:144804003+	MAPK15	0	0	0	0	0	0	0
sgTRIB1_7_chr8:126445651-	TRIB1	0	0	0	0	0	0	0
sgCDK14_7_chr7:90585083-	CDK14	0	0	0	0	0	0	0
sgADRBK1_10_chr11:67049930+	ADRBK1	0	0	0	0	0	0	0
sgPRKD1_1_chr14:30396593+	PRKD1	0	0	0	0	0	0	0
sgCHEK1_4_chr11:125507376-	CHEK1	0	0	0	0	0	0	0
sgNEK5_3_chr13:52650237-	NEK5	0	0	0	0	0	0	0
sgC9orf96_2_chr9:136269057+	C9orf96	0	0	0	0	0	0	0
sgPTK7_10_chr6:43098074-	PTK7	0	0	0	0	0	0	0
sgPKN2_1_chr1:89236049-	PKN2	0	0	0	0	0	0	0
sgTP53RK_8_chr20:45317768+	TP53RK	0	0	0	0	0	0	0
sgSTK38L_4_chr12:27470837-	STK38L	0	0	0	0	0	0	0
sgADCK5_9_chr8:145608287+	ADCK5	0	0	0	0	0	0	0
sgSTK38_1_chr6:36485581-	STK38	0	0	0	0	0	0	0
sgPKN1_6_chr19:14552074+	PKN1	0	0	0	0	0	0	0
sgPDK3_2_chrX:24483645-	PDK3	0	0	0	0	0	0	0
sgCLK1_2_chr2:201721634-	CLK1	0	0	0	0	0	0	0
sgYES1_5_chr18:745986-	YES1	0	0	0	0	0	0	0
sgALPK1_9_chr4:113351612-	ALPK1	0	0	0	0	0	0	0
sgRPS6KC1_4_chr1:213414188+	RPS6KC1	0	0	0	0	0	0	0
sgZAP70_8_chr2:98354309+	ZAP70	0	0	0	0	0	0	0
sgLCK_9_chr1:32741983+	LCK	0	0	0	0	0	0	0
sgMAST4_6_chr5:65892682-	MAST4	0	0	0	0	0	0	0
sgDDR2_9_chr1:162729672+	DDR2	0	0	0	0	0	0	0
sgLCK_1_chr1:32740374-	LCK	0	0	0	0	0	0	0
sgTRIM28_5_chr19:59059747+	TRIM28	0	0	0	0	0	0	0
sgMAPK10_8_chr4:86985532-	MAPK10	0	0	0	0	0	0	0
sgMAP2K2_1_chr19:4123793-	MAP2K2	0	0	0	0	0	0	0
sgFGR_9_chr1:27950345-	FGR	0	0	0	0	0	0	0
sgMAP2K2_9_chr19:4117564-	MAP2K2	0	0	0	0	0	0	0
sgMAP3K13_5_chr3:185184683-	MAP3K13	0	0	0	0	0	0	0
sgPRKCB_9_chr16:24196774+	PRKCB	0	0	0	0	0	0	0
sgEGFR_6_chr7:55221753-	EGFR	0	0	0	0	0	0	0
sgLYN_7_chr8:56863286+	LYN	0	0	0	0	0	0	0
sgIRAK3_9_chr12:66638373+	IRAK3	0	0	0	0	0	0	0
sgCDK17_2_chr12:96704909-	CDK17	0	0	0	0	0	0	0
sgAURKC_2_chr19:57743527+	AURKC	0	0	0	0	0	0	0
sgCAMK1G_10_chr1:209785366-	CAMK1G	0	0	0	0	0	0	0
sgMAP3K9_4_chr14:71199703-	MAP3K9	0	0	0	0	0	0	0
sgRPS6KA3_5_chrX:20284684-	RPS6KA3	0	0	0	0	0	0	0
sgMAP4K1_7_chr19:39096089+	MAP4K1	0	0	0	0	0	0	0
sgSCYL3_4_chr1:169831855+	SCYL3	0	0	0	0	0	0	0
sgEPHA8_3_chr1:22903023-	EPHA8	0	0	0	0	0	0	0
sgRIPK2_1_chr8:90770279+	RIPK2	0	0	0	0	0	0	0
sgMAP3K5_4_chr6:137113126+	MAP3K5	0	0	0	0	0	0	0
sgCLK4_8_chr5:178050347-	CLK4	0	0	0	0	0	0	0
sgMAPK10_7_chr4:86988941+	MAPK10	0	0	0	0	0	0	0
sgSTK3_5_chr8:99560362-	STK3	0	0	0	0	0	0	0
sgCDC42BPB_3_chr14:103440451-	CDC42BPB	0	0	0	0	0	0	0
sgPRPF4B_2_chr6:4041040+	PRPF4B	0	0	0	0	0	0	0
sgMAP4K3_3_chr2:39485658+	MAP4K3	0	0	0	0	0	0	0
sgCDC7_10_chr1:91967279+	CDC7	0	0	0	0	0	0	0
sgSTK3_1_chr8:99786970-	STK3	0	0	0	0	0	0	0
sgPRKCI_3_chr3:169940488+	PRKCI	0	0	0	0	0	0	0
sgNLK_5_chr17:26490599+	NLK	0	0	0	0	0	0	0
sgADRBK2_9_chr22:25961099+	ADRBK2	0	0	0	0	0	0	0
sgNEK11_3_chr3:130889679-	NEK11	0	0	0	0	0	0	0
sgEIF2AK1_4_chr7:6094259+	EIF2AK1	0	0	0	0	0	0	0
sgSTK38L_7_chr12:27467552-	STK38L	0	0	0	0	0	0	0
sgROCK2_3_chr2:11337750-	ROCK2	0	0	0	0	0	0	0
sgC9orf96_3_chr9:136269986+	C9orf96	0	0	0	0	0	0	0
sgVRK2_5_chr2:58276031+	VRK2	0	0	0	0	0	0	0
sgWNK4_5_chr17:40947206-	WNK4	0	0	0	0	0	0	0
sgCDK4_5_chr12:58145379-	CDK4	0	0	0	0	0	0	0
sgCDC7_3_chr1:91981355+	CDC7	0	0	0	0	0	0	0
sgALPK2_10_chr18:56204888-	ALPK2	0	0	0	0	0	0	0
sgACVR2A_9_chr2:148677887+	ACVR2A	0	0	0	0	0	0	0
sgTNNI3K_5_chr1:74957790+	TNNI3K	0	0	0	0	0	0	0
sgAKT3_3_chr1:243809317-	AKT3	0	0	0	0	0	0	0
sgAKT2_4_chr19:40743957-	AKT2	0	0	0	0	0	0	0
sgPRKCA_9_chr17:64731606+	PRKCA	0	0	0	0	0	0	0
sgRPS6KL1_8_chr14:75378516-	RPS6KL1	0	0	0	0	0	0	0
sgCASK_2_chrX:41420835-	CASK	0	0	0	0	0	0	0
sgCDK12_3_chr17:37618792+	CDK12	0	0	0	0	0	0	0
sgCLK2_3_chr1:155235653-	CLK2	0	0	0	0	0	0	0
sgPKN2_2_chr1:89271623-	PKN2	0	0	0	0	0	0	0
sgCDK8_6_chr13:26828876+	CDK8	0	0	0	0	0	0	0
sgPAK3_9_chrX:110366421+	PAK3	0	0	0	0	0	0	0
sgHIPK1_1_chr1:114511203-	HIPK1	0	0	0	0	0	0	0
sgIKBKB_4_chr8:42174323+	IKBKB	0	0	0	0	0	0	0
sgHIPK3_9_chr11:33370238+	HIPK3	0	0	0	0	0	0	0
sgPKN2_6_chr1:89271347-	PKN2	0	0	0	0	0	0	0
sgHIPK4_7_chr19:40886973-	HIPK4	0	0	0	0	0	0	0
sgBRD2_5_chr6:32946007+	BRD2	0	0	0	0	0	0	0
sgBUB1B_5_chr15:40491853+	BUB1B	0	0	0	0	0	0	0
sgERBB3_9_chr12:56478921-	ERBB3	0	0	0	0	0	0	0
sgCSNK1A1L_10_chr13:37679186-	CSNK1A1L	0	0	0	0	0	0	0
sgMYLK4_2_chr6:2685733-	MYLK4	0	0	0	0	0	0	0
sgTAOK1_4_chr17:27861279+	TAOK1	0	0	0	0	0	0	0
sgPRKCA_8_chr17:64684548-	PRKCA	0	0	0	0	0	0	0
sgCAMK4_10_chr5:110560321+	CAMK4	0	0	0	0	0	0	0
sgRET_2_chr10:43608359-	RET	0	0	0	0	0	0	0
sgLRRK2_2_chr12:40619395-	LRRK2	0	0	0	0	0	0	0
sgTAF1L_2_chr9:32634442-	TAF1L	0	0	0	0	0	0	0
sgNRBP2_6_chr8:144920899-	NRBP2	0	0	0	0	0	0	0
sgGRK4_3_chr4:3031037+	GRK4	0	0	0	0	0	0	0
sgSTK19_5_chr6:31939903-	STK19	0	0	0	0	0	0	0
sgAKT1_8_chr14:105242108-	AKT1	0	0	0	0	0	0	0
sgKIT_1_chr4:55564490+	KIT	0	0	0	0	0	0	0
sgMKNK2_10_chr19:2043536-	MKNK2	0	0	0	0	0	0	0
sgMAP2K3_1_chr17:21203901+	MAP2K3	0	0	0	0	0	0	0
sgPAK1_8_chr11:77043822+	PAK1	0	0	0	0	0	0	0
sgSTK3_6_chr8:99591909-	STK3	0	0	0	0	0	0	0
sgTSSK4_5_chr14:24675891-	TSSK4	0	0	0	0	0	0	0
sgCAMKK2_3_chr12:121691234+	CAMKK2	0	0	0	0	0	0	0
sgSMG1_1_chr16:18847388+	SMG1	0	0	0	0	0	0	0
sgPTK2B_2_chr8:27293289+	PTK2B	0	0	0	0	0	0	0
sgCHUK_7_chr10:101954252-	CHUK	0	0	0	0	0	0	0
sgBMX_10_chrX:15534312+	BMX	0	0	0	0	0	0	0
sgMARK4_10_chr19:45766403+	MARK4	0	0	0	0	0	0	0
sgEPHB1_9_chr3:134911502+	EPHB1	0	0	0	0	0	0	0
sgCSNK1D_2_chr17:80211003-	CSNK1D	0	0	0	0	0	0	0
sgDYRK1B_2_chr19:40321180-	DYRK1B	0	0	0	0	0	0	0
sgMAST1_3_chr19:12951874-	MAST1	0	0	0	0	0	0	0
sgABL2_2_chr1:179090949+	ABL2	0	0	0	0	0	0	0
sgPIM2_6_chrX:48772564-	PIM2	0	0	0	0	0	0	0
sgEPHB1_2_chr3:134670307+	EPHB1	0	0	0	0	0	0	0
sgSTK38_5_chr6:36475271+	STK38	0	0	0	0	0	0	0
sgHSPB8_9_chr12:119617456+	HSPB8	0	0	0	0	0	0	0
sgCAMKK1_4_chr17:3788751-	CAMKK1	0	0	0	0	0	0	0
sgBRD3_9_chr9:136918534+	BRD3	0	0	0	0	0	0	0
sgCSNK1G2_7_chr19:1969895+	CSNK1G2	0	0	0	0	0	0	0
sgMAPK8_7_chr10:49639274+	MAPK8	0	0	0	0	0	0	0
sgMST4_6_chrX:131206892-	MST4	0	0	0	0	0	0	0
sgNPR1_1_chr1:153652208+	NPR1	0	0	0	0	0	0	0
sgNTRK2_2_chr9:87338496-	NTRK2	0	0	0	0	0	0	0
sgFLT4_9_chr5:180052928+	FLT4	0	0	0	0	0	0	0
sgDMPK_6_chr19:46274612+	DMPK	0	0	0	0	0	0	0
sgPXK_5_chr3:58376926+	PXK	0	0	0	0	0	0	0
sgKALRN_3_chr3:124153201+	KALRN	0	0	0	0	0	0	0
sgADCK2_9_chr7:140379034-	ADCK2	0	0	0	0	0	0	0
sgSTK32C_3_chr10:134040375-	STK32C	0	0	0	0	0	0	0
sgMAP2K4_2_chr17:12032577-	MAP2K4	0	0	0	0	0	0	0
sgTRPM6_7_chr9:77400909+	TRPM6	0	0	0	0	0	0	0
sgSRPK1_10_chr6:35858773-	SRPK1	0	0	0	0	0	0	0
sgMAP4K5_7_chr14:50998690-	MAP4K5	0	0	0	0	0	0	0
sgSGK196_7_chr8:42958804-	SGK196	0	0	0	0	0	0	0
sgROR2_4_chr9:94499762-	ROR2	0	0	0	0	0	0	0
sgMAPK14_3_chr6:35995970+	MAPK14	0	0	0	0	0	0	0
sgVRK2_1_chr2:58313521-	VRK2	0	0	0	0	0	0	0
sgMAP2K1_8_chr15:66779573+	MAP2K1	0	0	0	0	0	0	0
sgRNASEL_8_chr1:182554914-	RNASEL	0	0	0	0	0	0	0
sgVRK3_2_chr19:50491654-	VRK3	0	0	0	0	0	0	0
sgRIPK4_2_chr21:43176786-	RIPK4	0	0	0	0	0	0	0
CTRL0081	CTRL0081	0	0	0	0	0	0	0
sgMLKL_10_chr16:74729513+	MLKL	0	0	0	0	0	0	0
sgERBB2_5_chr17:37866613-	ERBB2	0	0	0	0	0	0	0
sgERN2_1_chr16:23703568+	ERN2	0	0	0	0	0	0	0
sgCSNK2A1_1_chr20:469407-	CSNK2A1	0	0	0	0	0	0	0
sgVRK1_6_chr14:97299815+	VRK1	0	0	0	0	0	0	0
sgJAK1_4_chr1:65335004-	JAK1	0	0	0	0	0	0	0
sgACVR2A_5_chr2:148672778-	ACVR2A	0	0	0	0	0	0	0
sgPDK2_2_chr17:48174885-	PDK2	0	0	0	0	0	0	0
sgIRAK1_1_chrX:153284121-	IRAK1	0	0	0	0	0	0	0
sgMELK_9_chr9:36671016+	MELK	0	0	0	0	0	0	0
sgWEE1_1_chr11:9608278+	WEE1	0	0	0	0	0	0	0
sgLATS2_7_chr13:21562974+	LATS2	0	0	0	0	0	0	0
sgMAP2K1_3_chr15:66737024+	MAP2K1	0	0	0	0	0	0	0
sgNPR1_7_chr1:153651916-	NPR1	0	0	0	0	0	0	0
sgMYLK2_6_chr20:30409384+	MYLK2	0	0	0	0	0	0	0
sgKSR1_7_chr17:25915513+	KSR1	0	0	0	0	0	0	0
sgTSSK3_5_chr1:32828349-	TSSK3	0	0	0	0	0	0	0
sgTSSK3_6_chr1:32829428-	TSSK3	0	0	0	0	0	0	0
sgSRC_6_chr20:36030882-	SRC	0	0	0	0	0	0	0
sgNEK7_4_chr1:198201708+	NEK7	0	0	0	0	0	0	0
sgTP53RK_6_chr20:45317870+	TP53RK	0	0	0	0	0	0	0
sgACVRL1_8_chr12:52307770+	ACVRL1	0	0	0	0	0	0	0
sgCLK3_6_chr15:74918215+	CLK3	0	0	0	0	0	0	0
sgTEC_7_chr4:48230496-	TEC	0	0	0	0	0	0	0
sgLRRK1_7_chr15:101514095+	LRRK1	0	0	0	0	0	0	0
sgBMPR1A_8_chr10:88683402-	BMPR1A	0	0	0	0	0	0	0
sgSTK36_7_chr2:219553578+	STK36	0	0	0	0	0	0	0
sgCAMK2B_3_chr7:44281914+	CAMK2B	0	0	0	0	0	0	0
sgMAPK14_9_chr6:36020544-	MAPK14	0	0	0	0	0	0	0
sgIGF1R_6_chr15:99434839-	IGF1R	0	0	0	0	0	0	0
sgCSNK1G3_5_chr5:122940492+	CSNK1G3	0	0	0	0	0	0	0
sgPLK2_6_chr5:57755723-	PLK2	0	0	0	0	0	0	0
sgNEK10_5_chr3:27353620+	NEK10	0	0	0	0	0	0	0
sgMAP3K19_8_chr2:135738430+	MAP3K19	0	0	0	0	0	0	0
sgFLT3_8_chr13:28631555-	FLT3	0	0	0	0	0	0	0
sgTYK2_10_chr19:10467253+	TYK2	0	0	0	0	0	0	0
sgTRIB3_4_chr20:372179-	TRIB3	0	0	0	0	0	0	0
sgLCK_8_chr1:32741972-	LCK	0	0	0	0	0	0	0
sgPAK3_2_chrX:110406860-	PAK3	0	0	0	0	0	0	0
sgEPHA2_4_chr1:16464832+	EPHA2	0	0	0	0	0	0	0
sgTEC_1_chr4:48147531-	TEC	0	0	0	0	0	0	0
sgTRIB1_4_chr8:126443289-	TRIB1	0	0	0	0	0	0	0
sgTLK1_6_chr2:171912970+	TLK1	0	0	0	0	0	0	0
sgMAPK9_8_chr5:179676066+	MAPK9	0	0	0	0	0	0	0
sgAKT1_6_chr14:105246455-	AKT1	0	0	0	0	0	0	0
sgPIM3_1_chr22:50355313-	PIM3	0	0	0	0	0	0	0
sgPRKCZ_9_chr1:2082234+	PRKCZ	0	0	0	0	0	0	0
sgACVRL1_10_chr12:52309036+	ACVRL1	0	0	0	0	0	0	0
sgMAP3K4_1_chr6:161413069-	MAP3K4	0	0	0	0	0	0	0
sgCSNK1E_6_chr22:38694823+	CSNK1E	0	0	0	0	0	0	0
CTRL0076	CTRL0076	0	0	0	0	0	0	0
sgALPK1_1_chr4:113352282+	ALPK1	0	0	0	0	0	0	0
sgMAP3K11_3_chr11:65381023-	MAP3K11	0	0	0	0	0	0	0
sgCDK6_5_chr7:92355010-	CDK6	0	0	0	0	0	0	0
sgNEK8_3_chr17:27064421+	NEK8	0	0	0	0	0	0	0
sgITK_7_chr5:156638358+	ITK	0	0	0	0	0	0	0
sgTEC_8_chr4:48158687+	TEC	0	0	0	0	0	0	0
sgHUNK_3_chr21:33331261-	HUNK	0	0	0	0	0	0	0
sgRIPK3_4_chr14:24806362+	RIPK3	0	0	0	0	0	0	0
sgEPHA5_2_chr4:66356402+	EPHA5	0	0	0	0	0	0	0
sgPRKCE_10_chr2:45879565+	PRKCE	0	0	0	0	0	0	0
sgNEK10_8_chr3:27346344+	NEK10	0	0	0	0	0	0	0
sgNTRK3_7_chr15:88799200+	NTRK3	0	0	0	0	0	0	0
sgMYLK3_9_chr16:46766267-	MYLK3	0	0	0	0	0	0	0
sgULK1_10_chr12:132398283+	ULK1	0	0	0	0	0	0	0
sgGRK5_7_chr10:121182682-	GRK5	0	0	0	0	0	0	0
sgTBK1_6_chr12:64889327+	TBK1	0	0	0	0	0	0	0
sgULK4_6_chr3:41949402-	ULK4	0	0	0	0	0	0	0
sgCDKL4_7_chr2:39417493-	CDKL4	0	0	0	0	0	0	0
sgSLK_4_chr10:105762886+	SLK	0	0	0	0	0	0	0
sgMAP4K2_5_chr11:64567810-	MAP4K2	0	0	0	0	0	0	0
sgCDC42BPG_10_chr11:64609124-	CDC42BPG	0	0	0	0	0	0	0
sgC9orf96_9_chr9:136268876+	C9orf96	0	0	0	0	0	0	0
sgKSR2_8_chr12:118298229-	KSR2	0	0	0	0	0	0	0
sgPIM3_8_chr22:50354962+	PIM3	0	0	0	0	0	0	0
sgCSF1R_5_chr5:149456843+	CSF1R	0	0	0	0	0	0	0
sgBRSK2_4_chr11:1464357-	BRSK2	0	0	0	0	0	0	0
sgFGR_1_chr1:27940929+	FGR	0	0	0	0	0	0	0
sgBMPR2_5_chr2:203421059+	BMPR2	0	0	0	0	0	0	0
sgPINK1_1_chr1:20960352-	PINK1	0	0	0	0	0	0	0
sgDAPK2_1_chr15:64263702-	DAPK2	0	0	0	0	0	0	0
sgTNK2_4_chr3:195613887-	TNK2	0	0	0	0	0	0	0
sgROCK2_6_chr2:11332276-	ROCK2	0	0	0	0	0	0	0
sgSPEG_7_chr2:220329302+	SPEG	0	0	0	0	0	0	0
sgBCR_2_chr22:23596006-	BCR	0	0	0	0	0	0	0
sgNEK8_6_chr17:27064875-	NEK8	0	0	0	0	0	0	0
sgFLT1_9_chr13:29008332+	FLT1	0	0	0	0	0	0	0
sgPRKCE_1_chr2:45879241-	PRKCE	0	0	0	0	0	0	0
sgBMPR2_3_chr2:203420222+	BMPR2	0	0	0	0	0	0	0
sgSIK1_2_chr21:44845905-	SIK1	0	0	0	0	0	0	0
sgCDK7_8_chr5:68565087+	CDK7	0	0	0	0	0	0	0
sgNEK6_10_chr9:127076225+	NEK6	0	0	0	0	0	0	0
sgFLT4_7_chr5:180055955-	FLT4	0	0	0	0	0	0	0
CTRL0030	CTRL0030	0	0	0	0	0	0	0
sgMAPK3_6_chr16:30128223-	MAPK3	0	0	0	0	0	0	0
sgRIPK4_10_chr21:43187188-	RIPK4	0	0	0	0	0	0	0
sgPBK_8_chr8:27685679+	PBK	0	0	0	0	0	0	0
sgSTK35_5_chr20:2082564-	STK35	0	0	0	0	0	0	0
sgYES1_4_chr18:748006-	YES1	0	0	0	0	0	0	0
sgMOK_6_chr14:102695859+	MOK	0	0	0	0	0	0	0
sgMKNK1_2_chr1:47048955+	MKNK1	0	0	0	0	0	0	0
sgMAST3_1_chr19:18258291-	MAST3	0	0	0	0	0	0	0
sgPSKH1_8_chr16:67943163+	PSKH1	0	0	0	0	0	0	0
sgRNASEL_4_chr1:182554736-	RNASEL	0	0	0	0	0	0	0
sgEPHA5_1_chr4:66361215+	EPHA5	0	0	0	0	0	0	0
sgSRPK1_1_chr6:35840339+	SRPK1	0	0	0	0	0	0	0
sgKSR1_4_chr17:25904550+	KSR1	0	0	0	0	0	0	0
sgTTN_5_chr2:179665160-	TTN	0	0	0	0	0	0	0
sgRPS6KA6_3_chrX:83402025-	RPS6KA6	0	0	0	0	0	0	0
sgCAMK2A_9_chr5:149652691-	CAMK2A	0	0	0	0	0	0	0
sgSNRK_3_chr3:43344761+	SNRK	0	0	0	0	0	0	0
sgPAK6_2_chr15:40558260-	PAK6	0	0	0	0	0	0	0
sgGRK4_8_chr4:3029672+	GRK4	0	0	0	0	0	0	0
sgMAPKAPK2_4_chr1:206905039-	MAPKAPK2	0	0	0	0	0	0	0
sgDYRK2_6_chr12:68052286-	DYRK2	0	0	0	0	0	0	0
sgCSNK1A1_9_chr5:148930426+	CSNK1A1	0	0	0	0	0	0	0
sgACVR1_5_chr2:158637020+	ACVR1	0	0	0	0	0	0	0
sgMAPKAPK3_8_chr3:50679181+	MAPKAPK3	0	0	0	0	0	0	0
sgMAP3K5_8_chr6:137112855+	MAP3K5	0	0	0	0	0	0	0
sgTBK1_3_chr12:64883833+	TBK1	0	0	0	0	0	0	0
sgCLK2_6_chr1:155233743-	CLK2	0	0	0	0	0	0	0
sgEPHB1_5_chr3:134825310+	EPHB1	0	0	0	0	0	0	0
sgEPHA7_5_chr6:93967981-	EPHA7	0	0	0	0	0	0	0
sgEPHB6_5_chr7:142562404+	EPHB6	0	0	0	0	0	0	0
sgOXSR1_4_chr3:38287665-	OXSR1	0	0	0	0	0	0	0
sgPDK3_3_chrX:24521593-	PDK3	0	0	0	0	0	0	0
sgRET_4_chr10:43596082+	RET	0	0	0	0	0	0	0
sgFLT3_5_chr13:28608519+	FLT3	0	0	0	0	0	0	0
sgNTRK2_3_chr9:87342655-	NTRK2	0	0	0	0	0	0	0
sgCSNK2A1_4_chr20:468059+	CSNK2A1	0	0	0	0	0	0	0
sgTEK_8_chr9:27192548+	TEK	0	0	0	0	0	0	0
sgCSK_4_chr15:75091808+	CSK	0	0	0	0	0	0	0
sgMOS_2_chr8:57026283+	MOS	0	0	0	0	0	0	0
sgRIPK3_2_chr14:24807742-	RIPK3	0	0	0	0	0	0	0
sgSTK17B_10_chr2:197008359+	STK17B	0	0	0	0	0	0	0
sgDYRK1A_8_chr21:38868465-	DYRK1A	0	0	0	0	0	0	0
sgTRPM7_1_chr15:50940940-	TRPM7	0	0	0	0	0	0	0
sgULK4_10_chr3:41723071-	ULK4	0	0	0	0	0	0	0
sgTRIM33_9_chr1:114945408-	TRIM33	0	0	0	0	0	0	0
sgHIPK1_4_chr1:114506044-	HIPK1	0	0	0	0	0	0	0
sgTRPM6_2_chr9:77397347+	TRPM6	0	0	0	0	0	0	0
sgSTRADA_1_chr17:61790814-	STRADA	0	0	0	0	0	0	0
sgSGK3_2_chr8:67748288+	SGK3	0	0	0	0	0	0	0
sgLATS1_4_chr6:150005086+	LATS1	0	0	0	0	0	0	0
sgSRPK2_10_chr7:104782490+	SRPK2	0	0	0	0	0	0	0
sgRIPK2_7_chr8:90770374-	RIPK2	0	0	0	0	0	0	0
sgPTK2_8_chr8:141889662-	PTK2	0	0	0	0	0	0	0
sgMYO3B_7_chr2:171257997-	MYO3B	0	0	0	0	0	0	0
sgCDK17_1_chr12:96717747+	CDK17	0	0	0	0	0	0	0
sgMAPK9_2_chr5:179707484+	MAPK9	0	0	0	0	0	0	0
sgCASK_6_chrX:41485879+	CASK	0	0	0	0	0	0	0
sgCAMKK2_4_chr12:121712218-	CAMKK2	0	0	0	0	0	0	0
sgFGR_4_chr1:27942098-	FGR	0	0	0	0	0	0	0
sgTTN_8_chr2:179658256-	TTN	0	0	0	0	0	0	0
sgHSPB8_8_chr12:119617140-	HSPB8	0	0	0	0	0	0	0
sgPDGFRB_3_chr5:149512388+	PDGFRB	0	0	0	0	0	0	0
sgRPS6KA5_6_chr14:91467434-	RPS6KA5	0	0	0	0	0	0	0
sgNEK5_8_chr13:52667294-	NEK5	0	0	0	0	0	0	0
sgVRK1_4_chr14:97321671+	VRK1	0	0	0	0	0	0	0
sgGSK3B_8_chr3:119562164+	GSK3B	0	0	0	0	0	0	0
sgNEK3_5_chr13:52718947+	NEK3	0	0	0	0	0	0	0
sgBRSK1_10_chr19:55817703+	BRSK1	0	0	0	0	0	0	0
sgPAK6_10_chr15:40557169+	PAK6	0	0	0	0	0	0	0
sgNEK4_1_chr3:52804684-	NEK4	0	0	0	0	0	0	0
sgCDK6_6_chr7:92300771+	CDK6	0	0	0	0	0	0	0
sgMAP3K3_3_chr17:61766955-	MAP3K3	0	0	0	0	0	0	0
sgBCKDK_3_chr16:31120559+	BCKDK	0	0	0	0	0	0	0
sgERBB3_4_chr12:56477605+	ERBB3	0	0	0	0	0	0	0
sgCSNK1G3_8_chr5:122927016-	CSNK1G3	0	0	0	0	0	0	0
sgMYLK4_6_chr6:2693087-	MYLK4	0	0	0	0	0	0	0
sgPLK1_2_chr16:23690517+	PLK1	0	0	0	0	0	0	0
sgCLK3_8_chr15:74919965-	CLK3	0	0	0	0	0	0	0
sgERN1_6_chr17:62125304-	ERN1	0	0	0	0	0	0	0
sgNUAK1_8_chr12:106480568-	NUAK1	0	0	0	0	0	0	0
sgPRKACA_8_chr19:14208674+	PRKACA	0	0	0	0	0	0	0
sgNRK_8_chrX:105075076+	NRK	0	0	0	0	0	0	0
sgTRIM24_5_chr7:138263977-	TRIM24	0	0	0	0	0	0	0
sgMAP3K11_9_chr11:65375193-	MAP3K11	0	0	0	0	0	0	0
sgUHMK1_2_chr1:162473570+	UHMK1	0	0	0	0	0	0	0
sgTLK1_3_chr2:171853165-	TLK1	0	0	0	0	0	0	0
sgSGK223_4_chr8:8235457+	SGK223	0	0	0	0	0	0	0
sgFGFR2_5_chr10:123256174+	FGFR2	0	0	0	0	0	0	0
sgPRPF4B_7_chr6:4032478-	PRPF4B	0	0	0	0	0	0	0
sgIRAK4_5_chr12:44176195+	IRAK4	0	0	0	0	0	0	0
sgCSNK1A1L_7_chr13:37678647+	CSNK1A1L	0	0	0	0	0	0	0
sgMAPK14_7_chr6:36040722-	MAPK14	0	0	0	0	0	0	0
sgNRBP2_2_chr8:144918303-	NRBP2	0	0	0	0	0	0	0
sgBMX_7_chrX:15568009+	BMX	0	0	0	0	0	0	0
sgTNNI3K_6_chr1:74957838+	TNNI3K	0	0	0	0	0	0	0
sgULK4_7_chr3:41860905+	ULK4	0	0	0	0	0	0	0
sgGUCY2C_5_chr12:14834335-	GUCY2C	0	0	0	0	0	0	0
sgNEK9_4_chr14:75563829-	NEK9	0	0	0	0	0	0	0
sgPDK1_6_chr2:173435472+	PDK1	0	0	0	0	0	0	0
sgPDPK1_8_chr16:2607925+	PDPK1	0	0	0	0	0	0	0
sgLATS2_1_chr13:21562812-	LATS2	0	0	0	0	0	0	0
sgMAP2K7_2_chr19:7974729-	MAP2K7	0	0	0	0	0	0	0
sgNRBP1_7_chr2:27664005+	NRBP1	0	0	0	0	0	0	0
sgEIF2AK4_5_chr15:40257938-	EIF2AK4	0	0	0	0	0	0	0
sgRPS6KA1_4_chr1:26883516-	RPS6KA1	0	0	0	0	0	0	0
sgMARK3_3_chr14:103958268-	MARK3	0	0	0	0	0	0	0
sgGSK3B_2_chr3:119624640-	GSK3B	0	0	0	0	0	0	0
sgDSTYK_1_chr1:205180653-	DSTYK	0	0	0	0	0	0	0
sgPDPK1_2_chr16:2636808+	PDPK1	0	0	0	0	0	0	0
sgTTBK2_3_chr15:43086862+	TTBK2	0	0	0	0	0	0	0
sgLIMK2_2_chr22:31667151-	LIMK2	0	0	0	0	0	0	0
sgPHKG2_3_chr16:30767556+	PHKG2	0	0	0	0	0	0	0
sgTTBK1_2_chr6:43227423+	TTBK1	0	0	0	0	0	0	0
sgMAP3K4_7_chr6:161530933-	MAP3K4	0	0	0	0	0	0	0
sgOXSR1_10_chr3:38232238-	OXSR1	0	0	0	0	0	0	0
sgPLK3_6_chr1:45270117-	PLK3	0	0	0	0	0	0	0
sgCDK8_1_chr13:26828845+	CDK8	0	0	0	0	0	0	0
sgSTK17A_1_chr7:43622852+	STK17A	0	0	0	0	0	0	0
sgIRAK1_8_chrX:153284439+	IRAK1	0	0	0	0	0	0	0
sgPRKD3_3_chr2:37543599+	PRKD3	0	0	0	0	0	0	0
sgSPEG_6_chr2:220329195+	SPEG	0	0	0	0	0	0	0
sgJAK1_8_chr1:65316558-	JAK1	0	0	0	0	0	0	0
sgIRAK2_4_chr3:10258627-	IRAK2	0	0	0	0	0	0	0
sgACVR1B_7_chr12:52379058-	ACVR1B	0	0	0	0	0	0	0
sgSTRADA_7_chr17:61784692-	STRADA	0	0	0	0	0	0	0
sgMKNK2_7_chr19:2041051+	MKNK2	0	0	0	0	0	0	0
sgBCKDK_8_chr16:31121624+	BCKDK	0	0	0	0	0	0	0
sgMAP2K2_7_chr19:4097295+	MAP2K2	0	0	0	0	0	0	0
sgRYK_4_chr3:133969373-	RYK	0	0	0	0	0	0	0
sgSGK196_8_chr8:42958810-	SGK196	0	0	0	0	0	0	0
sgFLT4_8_chr5:180053136+	FLT4	0	0	0	0	0	0	0
sgSTK25_10_chr2:242438173+	STK25	0	0	0	0	0	0	0
sgSTK33_7_chr11:8496357-	STK33	0	0	0	0	0	0	0
sgMAP3K8_1_chr10:30727865+	MAP3K8	0	0	0	0	0	0	0
sgMST1R_5_chr3:49940499+	MST1R	0	0	0	0	0	0	0
sgATR_7_chr3:142281881+	ATR	0	0	0	0	0	0	0
sgTRIM24_3_chr7:138199972+	TRIM24	0	0	0	0	0	0	0
sgNEK11_5_chr3:130799360-	NEK11	0	0	0	0	0	0	0
sgERBB4_10_chr2:212543780-	ERBB4	0	0	0	0	0	0	0
sgBLK_1_chr8:11407750+	BLK	0	0	0	0	0	0	0
sgPRKAA2_2_chr1:57169969-	PRKAA2	0	0	0	0	0	0	0
sgDMPK_4_chr19:46275066-	DMPK	0	0	0	0	0	0	0
sgAXL_2_chr19:41726651+	AXL	0	0	0	0	0	0	0
sgTTN_6_chr2:179664304+	TTN	0	0	0	0	0	0	0
sgMAPKAPK5_9_chr12:112323738+	MAPKAPK5	0	0	0	0	0	0	0
sgACVRL1_9_chr12:52308229+	ACVRL1	0	0	0	0	0	0	0
sgPAK2_4_chr3:196529960-	PAK2	0	0	0	0	0	0	0
sgMAP2K2_3_chr19:4099314+	MAP2K2	0	0	0	0	0	0	0
sgCAMK4_4_chr5:110784890-	CAMK4	0	0	0	0	0	0	0
sgCSNK2A2_1_chr16:58201600-	CSNK2A2	0	0	0	0	0	0	0
sgMAP3K8_9_chr10:30748387+	MAP3K8	0	0	0	0	0	0	0
sgWNK2_7_chr9:95947293+	WNK2	0	0	0	0	0	0	0
sgMUSK_9_chr9:113459706+	MUSK	0	0	0	0	0	0	0
sgSTK31_6_chr7:23830456-	STK31	0	0	0	0	0	0	0
sgCAMK4_3_chr5:110560304+	CAMK4	0	0	0	0	0	0	0
sgMELK_2_chr9:36665355+	MELK	0	0	0	0	0	0	0
sgCAMKV_7_chr3:49899001-	CAMKV	0	0	0	0	0	0	0
sgCAMK2D_6_chr4:114473244-	CAMK2D	0	0	0	0	0	0	0
sgRPS6KB2_10_chr11:67196465-	RPS6KB2	0	0	0	0	0	0	0
sgGRK6_10_chr5:176863213+	GRK6	0	0	0	0	0	0	0
sgNEK1_2_chr4:170428893-	NEK1	0	0	0	0	0	0	0
sgKDR_8_chr4:55970934+	KDR	0	0	0	0	0	0	0
sgFES_1_chr15:91428314-	FES	0	0	0	0	0	0	0
sgMAP4K4_4_chr2:102472531+	MAP4K4	0	0	0	0	0	0	0
sgMAP4K1_4_chr19:39100288+	MAP4K1	0	0	0	0	0	0	0
sgAMHR2_9_chr12:53818111-	AMHR2	0	0	0	0	0	0	0
sgBCKDK_2_chr16:31123185+	BCKDK	0	0	0	0	0	0	0
sgRIOK2_1_chr5:96503481-	RIOK2	0	0	0	0	0	0	0
sgULK4_9_chr3:41723251+	ULK4	0	0	0	0	0	0	0
sgJAK3_6_chr19:17952547+	JAK3	0	0	0	0	0	0	0
sgRYK_3_chr3:133969394+	RYK	0	0	0	0	0	0	0
sgADCK5_6_chr8:145618078+	ADCK5	0	0	0	0	0	0	0
sgSTK33_6_chr11:8457050-	STK33	0	0	0	0	0	0	0
sgCAMK1_2_chr3:9804824+	CAMK1	0	0	0	0	0	0	0
sgMAP3K3_4_chr17:61769152+	MAP3K3	0	0	0	0	0	0	0
sgNEK1_9_chr4:170327815+	NEK1	0	0	0	0	0	0	0
sgSTYK1_1_chr12:10774544+	STYK1	0	0	0	0	0	0	0
sgAKT3_10_chr1:243828076-	AKT3	0	0	0	0	0	0	0
sgCDK11A_3_chr1:1635283+	CDK11A	0	0	0	0	0	0	0
sgTGFBR2_2_chr3:30713581+	TGFBR2	0	0	0	0	0	0	0
sgMAPK15_1_chr8:144798568-	MAPK15	0	0	0	0	0	0	0
sgROR2_10_chr9:94495656+	ROR2	0	0	0	0	0	0	0
sgAMHR2_2_chr12:53818562-	AMHR2	0	0	0	0	0	0	0
sgEPHB3_10_chr3:184297477+	EPHB3	0	0	0	0	0	0	0
sgAURKC_7_chr19:57744970-	AURKC	0	0	0	0	0	0	0
sgKIT_4_chr4:55595507-	KIT	0	0	0	0	0	0	0
sgCDK2_5_chr12:56361946-	CDK2	0	0	0	0	0	0	0
sgTGFBR2_10_chr3:30713758-	TGFBR2	0	0	0	0	0	0	0
sgTIE1_10_chr1:43777391-	TIE1	0	0	0	0	0	0	0
sgALPK1_3_chr4:113352585+	ALPK1	0	0	0	0	0	0	0
sgCDK4_1_chr12:58145418-	CDK4	0	0	0	0	0	0	0
sgCHEK2_2_chr22:29090029-	CHEK2	0	0	0	0	0	0	0
sgMAP2K4_9_chr17:11998990+	MAP2K4	0	0	0	0	0	0	0
sgPRKCE_7_chr2:46378206-	PRKCE	0	0	0	0	0	0	0
sgNPR2_4_chr9:35801115-	NPR2	0	0	0	0	0	0	0
sgACVR1C_1_chr2:158443842-	ACVR1C	0	0	0	0	0	0	0
sgCIT_5_chr12:120263068-	CIT	0	0	0	0	0	0	0
sgPRKAA1_5_chr5:40767590-	PRKAA1	0	0	0	0	0	0	0
sgCLK1_5_chr2:201724905-	CLK1	0	0	0	0	0	0	0
sgNEK3_1_chr13:52730293-	NEK3	0	0	0	0	0	0	0
sgBRSK2_8_chr11:1467061+	BRSK2	0	0	0	0	0	0	0
sgEPHB3_1_chr3:184290386+	EPHB3	0	0	0	0	0	0	0
sgCDK9_6_chr9:130550603-	CDK9	0	0	0	0	0	0	0
sgRAF1_9_chr3:12626746-	RAF1	0	0	0	0	0	0	0
sgBRD4_4_chr19:15376215+	BRD4	0	0	0	0	0	0	0
sgSTK35_1_chr20:2083547+	STK35	0	0	0	0	0	0	0
sgMAP2K3_6_chr17:21206525+	MAP2K3	0	0	0	0	0	0	0
sgGSK3B_9_chr3:119721039-	GSK3B	0	0	0	0	0	0	0
sgMAP4K1_10_chr19:39088121+	MAP4K1	0	0	0	0	0	0	0
sgMOK_2_chr14:102717176-	MOK	0	0	0	0	0	0	0
sgPASK_8_chr2:242079938-	PASK	0	0	0	0	0	0	0
sgPDGFRA_2_chr4:55129868+	PDGFRA	0	0	0	0	0	0	0
sgPAK1_5_chr11:77066826+	PAK1	0	0	0	0	0	0	0
sgMKNK2_2_chr19:2042841-	MKNK2	0	0	0	0	0	0	0
sgSTRADA_4_chr17:61781839+	STRADA	0	0	0	0	0	0	0
sgMAP4K2_9_chr11:64564628+	MAP4K2	0	0	0	0	0	0	0
sgMYO3A_7_chr10:26310556+	MYO3A	0	0	0	0	0	0	0
sgSTK35_2_chr20:2082787+	STK35	0	0	0	0	0	0	0
sgHCK_2_chr20:30674471+	HCK	0	0	0	0	0	0	0
sgSIK3_7_chr11:116730051-	SIK3	0	0	0	0	0	0	0
sgIGF1R_2_chr15:99250909-	IGF1R	0	0	0	0	0	0	0
sgCLK4_4_chr5:178044424-	CLK4	0	0	0	0	0	0	0
sgDDR2_5_chr1:162724583+	DDR2	0	0	0	0	0	0	0
sgMASTL_7_chr10:27448664-	MASTL	0	0	0	0	0	0	0
sgHIPK3_4_chr11:33308341+	HIPK3	0	0	0	0	0	0	0
sgSRPK1_9_chr6:35888828-	SRPK1	0	0	0	0	0	0	0
sgTYK2_3_chr19:10477151+	TYK2	0	0	0	0	0	0	0
sgALPK2_1_chr18:56279016-	ALPK2	0	0	0	0	0	0	0
sgPAK3_5_chrX:110439709+	PAK3	0	0	0	0	0	0	0
sgSRPK3_3_chrX:153046667+	SRPK3	0	0	0	0	0	0	0
sgCDC42BPG_5_chr11:64594238-	CDC42BPG	0	0	0	0	0	0	0
sgMAST3_2_chr19:18218400+	MAST3	0	0	0	0	0	0	0
sgSTK3_2_chr8:99761551+	STK3	0	0	0	0	0	0	0
sgMAP3K9_2_chr14:71275586-	MAP3K9	0	0	0	0	0	0	0
sgMAP3K1_1_chr5:56111653-	MAP3K1	0	0	0	0	0	0	0
sgBRD2_10_chr6:32944104-	BRD2	0	0	0	0	0	0	0
sgERBB3_5_chr12:56478835+	ERBB3	0	0	0	0	0	0	0
sgMYLK3_6_chr16:46773971-	MYLK3	0	0	0	0	0	0	0
sgLATS1_2_chr6:150005458+	LATS1	0	0	0	0	0	0	0
sgEPHB3_6_chr3:184294629+	EPHB3	0	0	0	0	0	0	0
sgTTBK1_7_chr6:43230555-	TTBK1	0	0	0	0	0	0	0
CTRL0092	CTRL0092	0	0	0	0	0	0	0
sgBLK_7_chr8:11418849+	BLK	0	0	0	0	0	0	0
sgRAF1_1_chr3:12660016-	RAF1	0	0	0	0	0	0	0
sgPRKDC_9_chr8:48872611+	PRKDC	0	0	0	0	0	0	0
sgPKN3_9_chr9:131475421-	PKN3	0	0	0	0	0	0	0
sgRPS6KL1_6_chr14:75386535+	RPS6KL1	0	0	0	0	0	0	0
sgSNRK_4_chr3:43345019+	SNRK	0	0	0	0	0	0	0
sgTIE1_2_chr1:43770574-	TIE1	0	0	0	0	0	0	0
sgRPS6KA6_8_chrX:83419359-	RPS6KA6	0	0	0	0	0	0	0
sgTXK_8_chr4:48115283+	TXK	0	0	0	0	0	0	0
sgROR1_8_chr1:64605852-	ROR1	0	0	0	0	0	0	0
sgGRK1_7_chr13:114321749+	GRK1	0	0	0	0	0	0	0
sgTNK2_8_chr3:195595013+	TNK2	0	0	0	0	0	0	0
sgKSR2_9_chr12:118298212-	KSR2	0	0	0	0	0	0	0
sgBMPR2_9_chr2:203379630+	BMPR2	0	0	0	0	0	0	0
sgMAP3K10_6_chr19:40698598-	MAP3K10	0	0	0	0	0	0	0
sgBRD4_7_chr19:15366208+	BRD4	0	0	0	0	0	0	0
sgPRKCG_8_chr19:54395868+	PRKCG	0	0	0	0	0	0	0
sgPIM1_2_chr6:37138584+	PIM1	0	0	0	0	0	0	0
sgEPHA2_5_chr1:16464652+	EPHA2	0	0	0	0	0	0	0
sgPRKCQ_9_chr10:6557057-	PRKCQ	0	0	0	0	0	0	0
sgRNASEL_7_chr1:182555371-	RNASEL	0	0	0	0	0	0	0
sgPRKD2_8_chr19:47197232-	PRKD2	0	0	0	0	0	0	0
sgPDK1_9_chr2:173451103-	PDK1	0	0	0	0	0	0	0
sgCLK2_10_chr1:155238127-	CLK2	0	0	0	0	0	0	0
sgPLK2_5_chr5:57751403+	PLK2	0	0	0	0	0	0	0
sgCDK10_1_chr16:89757906+	CDK10	0	0	0	0	0	0	0
sgCASK_9_chrX:41402040-	CASK	0	0	0	0	0	0	0
sgCAMK2D_10_chr4:114381363+	CAMK2D	0	0	0	0	0	0	0
sgSTK39_1_chr2:168931666-	STK39	0	0	0	0	0	0	0
sgTIE1_9_chr1:43775093-	TIE1	0	0	0	0	0	0	0
sgLRRK1_3_chr15:101598296+	LRRK1	0	0	0	0	0	0	0
sgMAP2K5_2_chr15:67855652+	MAP2K5	0	0	0	0	0	0	0
sgZAP70_10_chr2:98351788+	ZAP70	0	0	0	0	0	0	0
sgALK_9_chr2:29940454+	ALK	0	0	0	0	0	0	0
sgPASK_5_chr2:242080042+	PASK	0	0	0	0	0	0	0
sgSTK17A_4_chr7:43635581+	STK17A	0	0	0	0	0	0	0
sgSTK36_10_chr2:219562285-	STK36	0	0	0	0	0	0	0
sgBMPR1B_3_chr4:96046267-	BMPR1B	0	0	0	0	0	0	0
sgNTRK1_9_chr1:156843746-	NTRK1	0	0	0	0	0	0	0
sgMAP3K2_5_chr2:128066194-	MAP3K2	0	0	0	0	0	0	0
sgMOS_4_chr8:57026509+	MOS	0	0	0	0	0	0	0
sgDYRK3_2_chr1:206811086-	DYRK3	0	0	0	0	0	0	0
sgZAP70_6_chr2:98351734+	ZAP70	0	0	0	0	0	0	0
sgGUCY2C_9_chr12:14825862-	GUCY2C	0	0	0	0	0	0	0
sgPRKCA_10_chr17:64731672+	PRKCA	0	0	0	0	0	0	0
sgTESK1_10_chr9:35606893+	TESK1	0	0	0	0	0	0	0
sgADCK3_5_chr1:227170594+	ADCK3	0	0	0	0	0	0	0
sgAKT3_9_chr1:243708891-	AKT3	0	0	0	0	0	0	0
sgSTK36_4_chr2:219538607+	STK36	0	0	0	0	0	0	0
sgEPHB2_5_chr1:23208955+	EPHB2	0	0	0	0	0	0	0
sgRIPK2_5_chr8:90770396-	RIPK2	0	0	0	0	0	0	0
sgRET_5_chr10:43596115-	RET	0	0	0	0	0	0	0
sgCAMK1_6_chr3:9809394-	CAMK1	0	0	0	0	0	0	0
sgSTK3_4_chr8:99591957-	STK3	0	0	0	0	0	0	0
sgNRBP2_8_chr8:144919640-	NRBP2	0	0	0	0	0	0	0
sgSRPK1_3_chr6:35840404-	SRPK1	0	0	0	0	0	0	0
sgBMP2K_9_chr4:79697854+	BMP2K	0	0	0	0	0	0	0
sgBRD3_6_chr9:136907028-	BRD3	0	0	0	0	0	0	0
sgADCK2_8_chr7:140373964-	ADCK2	0	0	0	0	0	0	0
sgERBB2_10_chr17:37872048+	ERBB2	0	0	0	0	0	0	0
sgCASK_10_chrX:41712385-	CASK	0	0	0	0	0	0	0
sgRIOK1_5_chr6:7405140+	RIOK1	0	0	0	0	0	0	0
sgBCKDK_7_chr16:31121570+	BCKDK	0	0	0	0	0	0	0
sgBCR_10_chr22:23615912+	BCR	0	0	0	0	0	0	0
sgBTK_10_chrX:100617618+	BTK	0	0	0	0	0	0	0
sgMARK2_8_chr11:63666108+	MARK2	0	0	0	0	0	0	0
sgNEK9_9_chr14:75580932+	NEK9	0	0	0	0	0	0	0
sgICK_3_chr6:52880975+	ICK	0	0	0	0	0	0	0
sgSGK3_7_chr8:67734652+	SGK3	0	0	0	0	0	0	0
sgMYLK_1_chr3:123339119-	MYLK	0	0	0	0	0	0	0
sgBCKDK_10_chr16:31122484-	BCKDK	0	0	0	0	0	0	0
sgWNK3_3_chrX:54360054-	WNK3	0	0	0	0	0	0	0
sgAATK_5_chr17:79094382-	AATK	0	0	0	0	0	0	0
sgSTK17A_6_chr7:43623000-	STK17A	0	0	0	0	0	0	0
sgADCK1_8_chr14:78353451-	ADCK1	0	0	0	0	0	0	0
sgGSK3B_5_chr3:119812240+	GSK3B	0	0	0	0	0	0	0
sgPTK6_6_chr20:62168539-	PTK6	0	0	0	0	0	0	0
sgEPHB3_8_chr3:184295215-	EPHB3	0	0	0	0	0	0	0
sgCDK16_3_chrX:47084400-	CDK16	0	0	0	0	0	0	0
sgBUB1_9_chr2:111419178-	BUB1	0	0	0	0	0	0	0
sgTNIK_3_chr3:170912347-	TNIK	0	0	0	0	0	0	0
sgPRKAA1_10_chr5:40764963-	PRKAA1	0	0	0	0	0	0	0
sgADCK4_2_chr19:41209703-	ADCK4	0	0	0	0	0	0	0
sgSGK223_3_chr8:8239131-	SGK223	0	0	0	0	0	0	0
sgTRIB2_8_chr2:12863495-	TRIB2	0	0	0	0	0	0	0
sgPHKG1_9_chr7:56156595-	PHKG1	0	0	0	0	0	0	0
sgCDK10_3_chr16:89757001+	CDK10	0	0	0	0	0	0	0
sgCAMK2G_10_chr10:75609069+	CAMK2G	0	0	0	0	0	0	0
sgLIMK1_6_chr7:73513448-	LIMK1	0	0	0	0	0	0	0
sgPAK6_6_chr15:40565570-	PAK6	0	0	0	0	0	0	0
sgCHUK_5_chr10:101953058-	CHUK	0	0	0	0	0	0	0
sgPRKDC_5_chr8:48872647-	PRKDC	0	0	0	0	0	0	0
CTRL0077	CTRL0077	0	0	0	0	0	0	0
sgEIF2AK2_9_chr2:37368716-	EIF2AK2	0	0	0	0	0	0	0
sgSGK494_9_chr17:26940647-	SGK494	0	0	0	0	0	0	0
sgBRSK2_9_chr11:1472593+	BRSK2	0	0	0	0	0	0	0
sgMAP2K7_10_chr19:7974969+	MAP2K7	0	0	0	0	0	0	0
sgCDC7_1_chr1:91973928+	CDC7	0	0	0	0	0	0	0
sgGRK7_10_chr3:141499276+	GRK7	0	0	0	0	0	0	0
sgABL2_9_chr1:179084052-	ABL2	0	0	0	0	0	0	0
sgMAPK4_10_chr18:48190405-	MAPK4	0	0	0	0	0	0	0
sgFRK_4_chr6:116277747-	FRK	0	0	0	0	0	0	0
sgATM_9_chr11:108122568-	ATM	0	0	0	0	0	0	0
sgCAMK4_9_chr5:110809005+	CAMK4	0	0	0	0	0	0	0
sgSGK1_1_chr6:134495182+	SGK1	0	0	0	0	0	0	0
sgMYLK2_1_chr20:30408239+	MYLK2	0	0	0	0	0	0	0
sgPLK4_9_chr4:128807741+	PLK4	0	0	0	0	0	0	0
sgDAPK2_5_chr15:64204375-	DAPK2	0	0	0	0	0	0	0
sgAAK1_10_chr2:69752167-	AAK1	0	0	0	0	0	0	0
sgCSNK1G2_9_chr19:1979316+	CSNK1G2	0	0	0	0	0	0	0
sgTLK1_7_chr2:171906405-	TLK1	0	0	0	0	0	0	0
sgTIE1_7_chr1:43774719-	TIE1	0	0	0	0	0	0	0
sgRPS6KA4_9_chr11:64128990+	RPS6KA4	0	0	0	0	0	0	0
sgFLT3_9_chr13:28626752-	FLT3	0	0	0	0	0	0	0
sgCDKL3_8_chr5:133686019-	CDKL3	0	0	0	0	0	0	0
sgSTK38L_8_chr12:27470917+	STK38L	0	0	0	0	0	0	0
sgEPHA4_10_chr2:222294776-	EPHA4	0	0	0	0	0	0	0
sgPRKACB_4_chr1:84644900+	PRKACB	0	0	0	0	0	0	0
sgLATS2_8_chr13:21562769+	LATS2	0	0	0	0	0	0	0
sgEPHA6_6_chr3:97356744+	EPHA6	0	0	0	0	0	0	0
sgRIOK2_6_chr5:96503198+	RIOK2	0	0	0	0	0	0	0
sgACVR1_1_chr2:158655959+	ACVR1	0	0	0	0	0	0	0
sgFGFR4_4_chr5:176519362+	FGFR4	0	0	0	0	0	0	0
sgTNK2_2_chr3:195594692+	TNK2	0	0	0	0	0	0	0
sgMARK3_8_chr14:103871500+	MARK3	0	0	0	0	0	0	0
sgNTRK3_3_chr15:88679169-	NTRK3	0	0	0	0	0	0	0
sgMAP3K9_3_chr14:71199826+	MAP3K9	0	0	0	0	0	0	0
sgRPS6KA4_4_chr11:64127797-	RPS6KA4	0	0	0	0	0	0	0
sgMYLK4_9_chr6:2689087-	MYLK4	0	0	0	0	0	0	0
sgTTN_2_chr2:179666981-	TTN	0	0	0	0	0	0	0
sgADCK1_2_chr14:78353537+	ADCK1	0	0	0	0	0	0	0
sgTRPM7_4_chr15:50906000+	TRPM7	0	0	0	0	0	0	0
sgROCK1_7_chr18:18624122-	ROCK1	0	0	0	0	0	0	0
sgRIOK3_8_chr18:21054990-	RIOK3	0	0	0	0	0	0	0
sgMTOR_6_chr1:11313904-	MTOR	0	0	0	0	0	0	0
sgRPS6KA6_1_chrX:83442849-	RPS6KA6	0	0	0	0	0	0	0
sgSCYL1_8_chr11:65303777+	SCYL1	0	0	0	0	0	0	0
sgEEF2K_4_chr16:22278021+	EEF2K	0	0	0	0	0	0	0
sgROCK1_1_chr18:18586347-	ROCK1	0	0	0	0	0	0	0
sgMAP4K1_8_chr19:39090725-	MAP4K1	0	0	0	0	0	0	0
sgMAP3K14_5_chr17:43368016-	MAP3K14	0	0	0	0	0	0	0
sgPEAK1_2_chr15:77472969-	PEAK1	0	0	0	0	0	0	0
CTRL0049	CTRL0049	0	0	0	0	0	0	0
sgRET_3_chr10:43572732-	RET	0	0	0	0	0	0	0
sgMAP4K4_7_chr2:102486173+	MAP4K4	0	0	0	0	0	0	0
sgCDK18_6_chr1:205492704+	CDK18	0	0	0	0	0	0	0
sgRPS6KA4_3_chr11:64136933+	RPS6KA4	0	0	0	0	0	0	0
sgMERTK_5_chr2:112686874-	MERTK	0	0	0	0	0	0	0
sgZAK_5_chr2:174074542+	ZAK	0	0	0	0	0	0	0
sgALPK1_8_chr4:113333009+	ALPK1	0	0	0	0	0	0	0
sgOBSCN_6_chr1:228463483+	OBSCN	0	0	0	0	0	0	0
sgPKN2_5_chr1:89271314-	PKN2	0	0	0	0	0	0	0
sgTEC_2_chr4:48147473-	TEC	0	0	0	0	0	0	0
sgCAMK1_1_chr3:9807522-	CAMK1	0	0	0	0	0	0	0
sgMOK_10_chr14:102698874-	MOK	0	0	0	0	0	0	0
sgADCK2_6_chr7:140373543-	ADCK2	0	0	0	0	0	0	0
sgERBB4_9_chr2:212568900-	ERBB4	0	0	0	0	0	0	0
sgPLK2_10_chr5:57751532-	PLK2	0	0	0	0	0	0	0
sgSTK10_2_chr5:171491804-	STK10	0	0	0	0	0	0	0
sgCDC42BPA_3_chr1:227262041-	CDC42BPA	0	0	0	0	0	0	0
sgSTK3_7_chr8:99560326-	STK3	0	0	0	0	0	0	0
sgMAP4K2_6_chr11:64567643+	MAP4K2	0	0	0	0	0	0	0
sgEPHA6_3_chr3:97251223+	EPHA6	0	0	0	0	0	0	0
sgDYRK4_7_chr12:4705347+	DYRK4	0	0	0	0	0	0	0
sgSTK32B_1_chr4:5468517+	STK32B	0	0	0	0	0	0	0
sgSTK36_2_chr2:219556992-	STK36	0	0	0	0	0	0	0
sgALK_5_chr2:30143386+	ALK	0	0	0	0	0	0	0
sgKDR_5_chr4:55976647-	KDR	0	0	0	0	0	0	0
sgNPR2_7_chr9:35805922+	NPR2	0	0	0	0	0	0	0
sgZAK_8_chr2:174055817+	ZAK	0	0	0	0	0	0	0
sgEPHA3_2_chr3:89391112-	EPHA3	0	0	0	0	0	0	0
sgPBK_9_chr8:27679962+	PBK	0	0	0	0	0	0	0
sgNPR1_8_chr1:153651952-	NPR1	0	0	0	0	0	0	0
sgSTK32B_8_chr4:5332947+	STK32B	0	0	0	0	0	0	0
sgROR1_7_chr1:64516370-	ROR1	0	0	0	0	0	0	0
sgDCLK1_8_chr13:36413272+	DCLK1	0	0	0	0	0	0	0
sgPHKG2_6_chr16:30767760+	PHKG2	0	0	0	0	0	0	0
CTRL0099	CTRL0099	0	0	0	0	0	0	0
sgEPHA8_6_chr1:22903279+	EPHA8	0	0	0	0	0	0	0
sgPIK3R4_5_chr3:130422587-	PIK3R4	0	0	0	0	0	0	0
sgPRKCE_4_chr2:46234684+	PRKCE	0	0	0	0	0	0	0
sgAURKB_8_chr17:8110480+	AURKB	0	0	0	0	0	0	0
sgCAMK1G_5_chr1:209778870+	CAMK1G	0	0	0	0	0	0	0
sgBTK_8_chrX:100630246+	BTK	0	0	0	0	0	0	0
sgNEK8_7_chr17:27064925+	NEK8	0	0	0	0	0	0	0
sgDYRK1B_7_chr19:40319104+	DYRK1B	0	0	0	0	0	0	0
sgCDK20_7_chr9:90586133-	CDK20	0	0	0	0	0	0	0
sgATM_3_chr11:108159741-	ATM	0	0	0	0	0	0	0
sgC9orf96_4_chr9:136251410-	C9orf96	0	0	0	0	0	0	0
sgDAPK3_5_chr19:3964847-	DAPK3	0	0	0	0	0	0	0
sgMAPK8_3_chr10:49628242+	MAPK8	0	0	0	0	0	0	0
sgFLT4_5_chr5:180056947+	FLT4	0	0	0	0	0	0	0
sgCDKL1_1_chr14:50825814-	CDKL1	0	0	0	0	0	0	0
sgCSNK1D_6_chr17:80223564-	CSNK1D	0	0	0	0	0	0	0
sgCDK5_1_chr7:150752417+	CDK5	0	0	0	0	0	0	0
CTRL0074	CTRL0074	0	0	0	0	0	0	0
sgGSK3B_7_chr3:119582349+	GSK3B	0	0	0	0	0	0	0
sgCDC42BPB_6_chr14:103523496-	CDC42BPB	0	0	0	0	0	0	0
sgTESK1_7_chr9:35608211-	TESK1	0	0	0	0	0	0	0
sgBMX_1_chrX:15534254-	BMX	0	0	0	0	0	0	0
sgHSPB8_1_chr12:119617119-	HSPB8	0	0	0	0	0	0	0
sgCDK10_7_chr16:89758268+	CDK10	0	0	0	0	0	0	0
sgKIT_6_chr4:55561692-	KIT	0	0	0	0	0	0	0
sgPAK7_3_chr20:9561443+	PAK7	0	0	0	0	0	0	0
sgAURKB_5_chr17:8110546-	AURKB	0	0	0	0	0	0	0
sgHUNK_1_chr21:33246191+	HUNK	0	0	0	0	0	0	0
sgPRKAA2_8_chr1:57161679-	PRKAA2	0	0	0	0	0	0	0
sgBRDT_10_chr1:92470028-	BRDT	0	0	0	0	0	0	0
sgARAF_4_chrX:47424661+	ARAF	0	0	0	0	0	0	0
sgCLK3_7_chr15:74919900+	CLK3	0	0	0	0	0	0	0
sgCSNK1G1_3_chr15:64592595+	CSNK1G1	0	0	0	0	0	0	0
sgMAP3K7_9_chr6:91228995+	MAP3K7	0	0	0	0	0	0	0
sgMAP3K2_7_chr2:128083307+	MAP3K2	0	0	0	0	0	0	0
sgCDK2_6_chr12:56362585-	CDK2	0	0	0	0	0	0	0
sgNRBP1_5_chr2:27662746-	NRBP1	0	0	0	0	0	0	0
sgLIMK2_4_chr22:31655985-	LIMK2	0	0	0	0	0	0	0
sgCAMK2G_5_chr10:75606991-	CAMK2G	0	0	0	0	0	0	0
sgRPS6KA6_2_chrX:83402038-	RPS6KA6	0	0	0	0	0	0	0
sgMAPKAPK2_1_chr1:206905230+	MAPKAPK2	0	0	0	0	0	0	0
sgFGFR3_10_chr4:1807834+	FGFR3	0	0	0	0	0	0	0
sgPAK4_8_chr19:39660351-	PAK4	0	0	0	0	0	0	0
sgFER_9_chr5:108290486-	FER	0	0	0	0	0	0	0
sgRPS6KA6_7_chrX:83361409+	RPS6KA6	0	0	0	0	0	0	0
sgAAK1_8_chr2:69769648+	AAK1	0	0	0	0	0	0	0
sgLMTK2_2_chr7:97788713-	LMTK2	0	0	0	0	0	0	0
sgACVR2A_10_chr2:148680579+	ACVR2A	0	0	0	0	0	0	0
sgMAP3K7_3_chr6:91257071-	MAP3K7	0	0	0	0	0	0	0
sgERN2_6_chr16:23718156-	ERN2	0	0	0	0	0	0	0
sgTNNI3K_9_chr1:74905179-	TNNI3K	0	0	0	0	0	0	0
sgCDC42BPB_9_chr14:103450021-	CDC42BPB	0	0	0	0	0	0	0
sgSTK38_10_chr6:36492168-	STK38	0	0	0	0	0	0	0
sgSTK40_8_chr1:36823933-	STK40	0	0	0	0	0	0	0
sgMUSK_7_chr9:113449484+	MUSK	0	0	0	0	0	0	0
sgNEK6_1_chr9:127064287+	NEK6	0	0	0	0	0	0	0
sgMLKL_2_chr16:74708923+	MLKL	0	0	0	0	0	0	0
sgSGK1_4_chr6:134495153+	SGK1	0	0	0	0	0	0	0
sgACVR1C_8_chr2:158401015+	ACVR1C	0	0	0	0	0	0	0
sgSPEG_2_chr2:220326770-	SPEG	0	0	0	0	0	0	0
sgNTRK1_4_chr1:156837941+	NTRK1	0	0	0	0	0	0	0
sgALPK3_10_chr15:85384072-	ALPK3	0	0	0	0	0	0	0
sgMYLK3_4_chr16:46781921-	MYLK3	0	0	0	0	0	0	0
sgAURKC_1_chr19:57746379-	AURKC	0	0	0	0	0	0	0
sgWNK1_10_chr12:994228-	WNK1	0	0	0	0	0	0	0
sgACVR1B_3_chr12:52370282-	ACVR1B	0	0	0	0	0	0	0
sgCDKL3_1_chr5:133643919-	CDKL3	0	0	0	0	0	0	0
sgSTK10_9_chr5:171583711-	STK10	0	0	0	0	0	0	0
sgMAST2_6_chr1:46496929+	MAST2	0	0	0	0	0	0	0
sgNEK6_9_chr9:127074836+	NEK6	0	0	0	0	0	0	0
sgRPS6KB2_4_chr11:67202076+	RPS6KB2	0	0	0	0	0	0	0
sgMAPK8_9_chr10:49628331-	MAPK8	0	0	0	0	0	0	0
sgEPHA4_2_chr2:222436948+	EPHA4	0	0	0	0	0	0	0
sgPRKCD_3_chr3:53219682+	PRKCD	0	0	0	0	0	0	0
sgMAPK3_8_chr16:30129702+	MAPK3	0	0	0	0	0	0	0
sgABL2_3_chr1:179095739-	ABL2	0	0	0	0	0	0	0
sgSTK35_8_chr20:2083452+	STK35	0	0	0	0	0	0	0
sgPKN3_8_chr9:131469545-	PKN3	0	0	0	0	0	0	0
sgPSKH1_5_chr16:67942950+	PSKH1	0	0	0	0	0	0	0
sgPIM2_2_chrX:48772368-	PIM2	0	0	0	0	0	0	0
sgNTRK3_8_chr15:88690589+	NTRK3	0	0	0	0	0	0	0
sgNLK_9_chr17:26370274-	NLK	0	0	0	0	0	0	0
sgULK2_5_chr17:19700719+	ULK2	0	0	0	0	0	0	0
sgHIPK2_7_chr7:139416673+	HIPK2	0	0	0	0	0	0	0
sgATR_5_chr3:142212077-	ATR	0	0	0	0	0	0	0
sgCAMK1_3_chr3:9804648+	CAMK1	0	0	0	0	0	0	0
sgSTK24_9_chr13:99118742+	STK24	0	0	0	0	0	0	0
sgMAP3K6_7_chr1:27688313+	MAP3K6	0	0	0	0	0	0	0
sgABL2_7_chr1:179095767-	ABL2	0	0	0	0	0	0	0
sgMATK_9_chr19:3781620-	MATK	0	0	0	0	0	0	0
sgERBB2_6_chr17:37866671+	ERBB2	0	0	0	0	0	0	0
sgMAP3K2_2_chr2:128088039-	MAP3K2	0	0	0	0	0	0	0
sgMUSK_8_chr9:113449496+	MUSK	0	0	0	0	0	0	0
sgBRSK2_5_chr11:1464823+	BRSK2	0	0	0	0	0	0	0
sgCDK19_9_chr6:110942344+	CDK19	0	0	0	0	0	0	0
sgMAPK4_8_chr18:48252372+	MAPK4	0	0	0	0	0	0	0
sgPEAK1_7_chr15:77473350-	PEAK1	0	0	0	0	0	0	0
sgCDK17_4_chr12:96717816+	CDK17	0	0	0	0	0	0	0
sgMAPK4_3_chr18:48190607+	MAPK4	0	0	0	0	0	0	0
sgZAK_9_chr2:174062777+	ZAK	0	0	0	0	0	0	0
sgEPHA7_4_chr6:94066446-	EPHA7	0	0	0	0	0	0	0
sgMAPK13_6_chr6:36106798+	MAPK13	0	0	0	0	0	0	0
sgRPS6KC1_7_chr1:213341240+	RPS6KC1	0	0	0	0	0	0	0
sgTRIM24_10_chr7:138239508+	TRIM24	0	0	0	0	0	0	0
sgKALRN_6_chr3:124351455+	KALRN	0	0	0	0	0	0	0
sgCDKL5_8_chrX:18582593+	CDKL5	0	0	0	0	0	0	0
sgPAK7_6_chr20:9546861+	PAK7	0	0	0	0	0	0	0
sgTGFBR2_8_chr3:30713605+	TGFBR2	0	0	0	0	0	0	0
sgTESK1_3_chr9:35606261+	TESK1	0	0	0	0	0	0	0
sgTSSK3_2_chr1:32828306+	TSSK3	0	0	0	0	0	0	0
sgDYRK1B_9_chr19:40316889+	DYRK1B	0	0	0	0	0	0	0
sgADRBK1_7_chr11:67047323+	ADRBK1	0	0	0	0	0	0	0
sgBLK_10_chr8:11412269+	BLK	0	0	0	0	0	0	0
sgCDKL3_3_chr5:133657554-	CDKL3	0	0	0	0	0	0	0
sgLMTK3_7_chr19:49013362+	LMTK3	0	0	0	0	0	0	0
sgMKNK2_5_chr19:2041922+	MKNK2	0	0	0	0	0	0	0
sgPRKDC_8_chr8:48872622-	PRKDC	0	0	0	0	0	0	0
sgCDK8_2_chr13:26828827+	CDK8	0	0	0	0	0	0	0
sgMAPK3_9_chr16:30134521-	MAPK3	0	0	0	0	0	0	0
sgPDK3_6_chrX:24523388-	PDK3	0	0	0	0	0	0	0
sgPRKD3_7_chr2:37501587+	PRKD3	0	0	0	0	0	0	0
sgICK_2_chr6:52884104+	ICK	0	0	0	0	0	0	0
sgSRC_10_chr20:36012731+	SRC	0	0	0	0	0	0	0
sgPXK_4_chr3:58376343+	PXK	0	0	0	0	0	0	0
sgINSR_8_chr19:7184410-	INSR	0	0	0	0	0	0	0
sgGAK_6_chr4:860761-	GAK	0	0	0	0	0	0	0
sgPTK2_9_chr8:141889580-	PTK2	0	0	0	0	0	0	0
sgINSR_9_chr19:7172348+	INSR	0	0	0	0	0	0	0
sgSRC_8_chr20:36031248+	SRC	0	0	0	0	0	0	0
sgRIOK1_2_chr6:7393416+	RIOK1	0	0	0	0	0	0	0
sgMAP2K6_6_chr17:67515507+	MAP2K6	0	0	0	0	0	0	0
sgCLK4_1_chr5:178045622+	CLK4	0	0	0	0	0	0	0
sgMAPK6_10_chr15:52356794-	MAPK6	0	0	0	0	0	0	0
sgTGFBR2_5_chr3:30686385-	TGFBR2	0	0	0	0	0	0	0
sgNEK7_6_chr1:198231727-	NEK7	0	0	0	0	0	0	0
sgBUB1_8_chr2:111419204+	BUB1	0	0	0	0	0	0	0
sgMAST4_4_chr5:66438262+	MAST4	0	0	0	0	0	0	0
sgTEX14_3_chr17:56638894-	TEX14	0	0	0	0	0	0	0
sgPRKD3_9_chr2:37543629+	PRKD3	0	0	0	0	0	0	0
CTRL0023	CTRL0023	0	0	0	0	0	0	0
sgTLK2_4_chr17:60683581+	TLK2	0	0	0	0	0	0	0
sgMST4_2_chrX:131197493-	MST4	0	0	0	0	0	0	0
sgARAF_5_chrX:47422359+	ARAF	0	0	0	0	0	0	0
sgMKNK2_9_chr19:2046439+	MKNK2	0	0	0	0	0	0	0
sgPAK2_2_chr3:196547309+	PAK2	0	0	0	0	0	0	0
sgTXK_10_chr4:48114462+	TXK	0	0	0	0	0	0	0
sgALK_1_chr2:30143215+	ALK	0	0	0	0	0	0	0
sgCDK2_8_chr12:56362695-	CDK2	0	0	0	0	0	0	0
sgRPS6KA6_5_chrX:83362008+	RPS6KA6	0	0	0	0	0	0	0
sgBMPR1B_7_chr4:96052640-	BMPR1B	0	0	0	0	0	0	0
CTRL0012	CTRL0012	0	0	0	0	0	0	0
sgCDC42BPB_7_chr14:103450064+	CDC42BPB	0	0	0	0	0	0	0
sgNEK5_2_chr13:52684689+	NEK5	0	0	0	0	0	0	0
sgDYRK2_4_chr12:68052063-	DYRK2	0	0	0	0	0	0	0
sgJAK1_3_chr1:65344709+	JAK1	0	0	0	0	0	0	0
sgJAK3_9_chr19:17950395+	JAK3	0	0	0	0	0	0	0
sgPKN3_10_chr9:131475839-	PKN3	0	0	0	0	0	0	0
sgTRIB2_3_chr2:12863547+	TRIB2	0	0	0	0	0	0	0
sgSGK223_9_chr8:8233998-	SGK223	0	0	0	0	0	0	0
sgCDK15_2_chr2:202672592-	CDK15	0	0	0	0	0	0	0
sgPDK4_1_chr7:95225599-	PDK4	0	0	0	0	0	0	0
sgCAMKV_3_chr3:49898413-	CAMKV	0	0	0	0	0	0	0
sgPDK2_5_chr17:48183272-	PDK2	0	0	0	0	0	0	0
sgTRIB2_2_chr2:12858578-	TRIB2	0	0	0	0	0	0	0
sgIRAK1_3_chrX:153278668-	IRAK1	0	0	0	0	0	0	0
sgSBK2_5_chr19:56047601-	SBK2	0	0	0	0	0	0	0
sgPRKDC_10_chr8:48872605+	PRKDC	0	0	0	0	0	0	0
sgBRDT_8_chr1:92457850+	BRDT	0	0	0	0	0	0	0
sgMAP2K7_9_chr19:7968904+	MAP2K7	0	0	0	0	0	0	0
sgERN2_3_chr16:23724631-	ERN2	0	0	0	0	0	0	0
sgAURKB_10_chr17:8109951-	AURKB	0	0	0	0	0	0	0
sgNEK8_8_chr17:27065119-	NEK8	0	0	0	0	0	0	0
sgMAP2K7_1_chr19:7968865-	MAP2K7	0	0	0	0	0	0	0
sgCDK9_10_chr9:130550620-	CDK9	0	0	0	0	0	0	0
sgTLK1_8_chr2:171906385+	TLK1	0	0	0	0	0	0	0
sgPRKACG_7_chr9:71628561+	PRKACG	0	0	0	0	0	0	0
sgCSNK1G3_1_chr5:122924119+	CSNK1G3	0	0	0	0	0	0	0
sgTRRAP_1_chr7:98527751+	TRRAP	0	0	0	0	0	0	0
sgBRD3_4_chr9:136915507+	BRD3	0	0	0	0	0	0	0
sgTRRAP_2_chr7:98547070-	TRRAP	0	0	0	0	0	0	0
sgTAOK2_6_chr16:29994899-	TAOK2	0	0	0	0	0	0	0
sgTNIK_1_chr3:170875417-	TNIK	0	0	0	0	0	0	0
sgNEK4_2_chr3:52800256+	NEK4	0	0	0	0	0	0	0
sgTBK1_5_chr12:64873832+	TBK1	0	0	0	0	0	0	0
sgRIPK1_7_chr6:3105929+	RIPK1	0	0	0	0	0	0	0
sgPRKACB_5_chr1:84650803+	PRKACB	0	0	0	0	0	0	0
sgNTRK3_9_chr15:88679795-	NTRK3	0	0	0	0	0	0	0
sgPIM2_9_chrX:48772354+	PIM2	0	0	0	0	0	0	0
sgCDK2_2_chr12:56364893+	CDK2	0	0	0	0	0	0	0
sgPNCK_4_chrX:152936783-	PNCK	0	0	0	0	0	0	0
sgNRBP1_10_chr2:27656936+	NRBP1	0	0	0	0	0	0	0
sgMAP3K6_4_chr1:27690467-	MAP3K6	0	0	0	0	0	0	0
sgMKNK1_10_chr1:47028368+	MKNK1	0	0	0	0	0	0	0
sgCDK9_4_chr9:130550549+	CDK9	0	0	0	0	0	0	0
sgSTYK1_4_chr12:10783821-	STYK1	0	0	0	0	0	0	0
sgAMHR2_5_chr12:53819661-	AMHR2	0	0	0	0	0	0	0
sgCIT_7_chr12:120210660-	CIT	0	0	0	0	0	0	0
sgTAF1L_7_chr9:32634346-	TAF1L	0	0	0	0	0	0	0
sgSTRADA_5_chr17:61787901-	STRADA	0	0	0	0	0	0	0
sgGUCY2C_8_chr12:14832631-	GUCY2C	0	0	0	0	0	0	0
sgCSNK2A2_6_chr16:58199597-	CSNK2A2	0	0	0	0	0	0	0
CTRL0032	CTRL0032	0	0	0	0	0	0	0
sgGRK5_3_chr10:120967460+	GRK5	0	0	0	0	0	0	0
sgTRIB3_5_chr20:368745+	TRIB3	0	0	0	0	0	0	0
sgSMG1_3_chr16:18860647+	SMG1	0	0	0	0	0	0	0
sgCDKL5_4_chrX:18627669+	CDKL5	0	0	0	0	0	0	0
sgPASK_9_chr2:242079331-	PASK	0	0	0	0	0	0	0
sgCAMKK2_9_chr12:121701633+	CAMKK2	0	0	0	0	0	0	0
sgMAP4K2_8_chr11:64564828-	MAP4K2	0	0	0	0	0	0	0
sgERN1_3_chr17:62144183+	ERN1	0	0	0	0	0	0	0
sgNUAK1_10_chr12:106480538+	NUAK1	0	0	0	0	0	0	0
sgIRAK4_1_chr12:44166786+	IRAK4	0	0	0	0	0	0	0
CTRL0052	CTRL0052	0	0	0	0	0	0	0
sgHIPK4_2_chr19:40886847+	HIPK4	0	0	0	0	0	0	0
sgADCK5_4_chr8:145617667-	ADCK5	0	0	0	0	0	0	0
sgPDK3_10_chrX:24545745-	PDK3	0	0	0	0	0	0	0
sgLIMK2_10_chr22:31658201+	LIMK2	0	0	0	0	0	0	0
sgBCR_9_chr22:23615850-	BCR	0	0	0	0	0	0	0
sgCSNK1A1_6_chr5:148930487-	CSNK1A1	0	0	0	0	0	0	0
sgMST4_9_chrX:131202258-	MST4	0	0	0	0	0	0	0
sgSLK_9_chr10:105761291+	SLK	0	0	0	0	0	0	0
sgBRD2_8_chr6:32943876+	BRD2	0	0	0	0	0	0	0
sgCDK18_10_chr1:205498519-	CDK18	0	0	0	0	0	0	0
sgCDK17_5_chr12:96682953+	CDK17	0	0	0	0	0	0	0
sgCDC42BPB_10_chr14:103447321+	CDC42BPB	0	0	0	0	0	0	0
sgCDK20_6_chr9:90589298+	CDK20	0	0	0	0	0	0	0
sgPRKG2_7_chr4:82064034-	PRKG2	0	0	0	0	0	0	0
sgGUCY2D_9_chr17:7906650-	GUCY2D	0	0	0	0	0	0	0
sgPAK1_2_chr11:77090342+	PAK1	0	0	0	0	0	0	0
sgFRK_9_chr6:116381378-	FRK	0	0	0	0	0	0	0
sgALK_3_chr2:30143496+	ALK	0	0	0	0	0	0	0
sgPAK6_1_chr15:40565081+	PAK6	0	0	0	0	0	0	0
sgALPK1_6_chr4:113353375-	ALPK1	0	0	0	0	0	0	0
sgCDKL4_1_chr2:39453068-	CDKL4	0	0	0	0	0	0	0
sgPAK2_3_chr3:196529883+	PAK2	0	0	0	0	0	0	0
sgEGFR_3_chr7:55221781+	EGFR	0	0	0	0	0	0	0
sgABL2_10_chr1:179100598-	ABL2	0	0	0	0	0	0	0
sgCDKL4_6_chr2:39417571+	CDKL4	0	0	0	0	0	0	0
sgTAOK1_9_chr17:27861135+	TAOK1	0	0	0	0	0	0	0
sgCDKL4_5_chr2:39417609+	CDKL4	0	0	0	0	0	0	0
sgCDC7_6_chr1:91978739+	CDC7	0	0	0	0	0	0	0
sgBMPR2_4_chr2:203421040+	BMPR2	0	0	0	0	0	0	0
sgCDKL1_6_chr14:50862421+	CDKL1	0	0	0	0	0	0	0
sgTAF1_2_chrX:70586243+	TAF1	0	0	0	0	0	0	0
sgEPHA7_6_chr6:93967835+	EPHA7	0	0	0	0	0	0	0
sgCDK6_4_chr7:92462457-	CDK6	0	0	0	0	0	0	0
sgBRD3_8_chr9:136905235-	BRD3	0	0	0	0	0	0	0
sgGRK4_5_chr4:3005985-	GRK4	0	0	0	0	0	0	0
sgGRK6_7_chr5:176861015+	GRK6	0	0	0	0	0	0	0
sgMAP4K4_8_chr2:102499095+	MAP4K4	0	0	0	0	0	0	0
sgTYK2_8_chr19:10468444+	TYK2	0	0	0	0	0	0	0
sgCIT_6_chr12:120241153+	CIT	0	0	0	0	0	0	0
sgSTK16_8_chr2:220111910+	STK16	0	0	0	0	0	0	0
sgPKN3_2_chr9:131477478-	PKN3	0	0	0	0	0	0	0
sgDSTYK_5_chr1:205180623+	DSTYK	0	0	0	0	0	0	0
sgKSR1_5_chr17:25909874-	KSR1	0	0	0	0	0	0	0
sgTSSK6_10_chr19:19626069+	TSSK6	0	0	0	0	0	0	0
sgSGK2_5_chr20:42200720-	SGK2	0	0	0	0	0	0	0
sgTTBK1_4_chr6:43220581+	TTBK1	0	0	0	0	0	0	0
sgPKN1_2_chr19:14561812+	PKN1	0	0	0	0	0	0	0
sgBRSK2_7_chr11:1467020+	BRSK2	0	0	0	0	0	0	0
sgTRIB1_5_chr8:126443464-	TRIB1	0	0	0	0	0	0	0
sgTRIM24_7_chr7:138200030+	TRIM24	0	0	0	0	0	0	0
sgSGK3_9_chr8:67740925-	SGK3	0	0	0	0	0	0	0
sgWEE1_6_chr11:9597819+	WEE1	0	0	0	0	0	0	0
sgCDK7_10_chr5:68530790+	CDK7	0	0	0	0	0	0	0
sgEPHB3_3_chr3:184297559+	EPHB3	0	0	0	0	0	0	0
sgSTK40_1_chr1:36826839-	STK40	0	0	0	0	0	0	0
sgPSKH1_2_chr16:67943036+	PSKH1	0	0	0	0	0	0	0
sgPDGFRA_6_chr4:55143565+	PDGFRA	0	0	0	0	0	0	0
sgAAK1_1_chr2:69757791-	AAK1	0	0	0	0	0	0	0
sgCSNK1D_10_chr17:80206822-	CSNK1D	0	0	0	0	0	0	0
sgFGFR1_2_chr8:38282083-	FGFR1	0	0	0	0	0	0	0
sgRIPK2_6_chr8:90782057+	RIPK2	0	0	0	0	0	0	0
sgDSTYK_7_chr1:205156866+	DSTYK	0	0	0	0	0	0	0
sgTTK_6_chr6:80721213+	TTK	0	0	0	0	0	0	0
sgMYO3B_2_chr2:171323174-	MYO3B	0	0	0	0	0	0	0
sgPKN2_10_chr1:89150290+	PKN2	0	0	0	0	0	0	0
sgNEK3_4_chr13:52728088-	NEK3	0	0	0	0	0	0	0
sgFGFR3_9_chr4:1807522+	FGFR3	0	0	0	0	0	0	0
sgMOK_5_chr14:102695954-	MOK	0	0	0	0	0	0	0
sgMOK_7_chr14:102749860-	MOK	0	0	0	0	0	0	0
sgSTRADB_8_chr2:202344815-	STRADB	0	0	0	0	0	0	0
sgROCK1_6_chr18:18625370-	ROCK1	0	0	0	0	0	0	0
sgKALRN_7_chr3:123953755-	KALRN	0	0	0	0	0	0	0
sgPRKCG_2_chr19:54385766-	PRKCG	0	0	0	0	0	0	0
sgPEAK1_9_chr15:77472066+	PEAK1	0	0	0	0	0	0	0
sgNEK5_6_chr13:52676340+	NEK5	0	0	0	0	0	0	0
sgMET_8_chr7:116339517+	MET	0	0	0	0	0	0	0
sgCSF1R_9_chr5:149439267+	CSF1R	0	0	0	0	0	0	0
sgTRIM33_8_chr1:114964065+	TRIM33	0	0	0	0	0	0	0
sgPBK_5_chr8:27678081+	PBK	0	0	0	0	0	0	0
sgEPHB6_3_chr7:142561995-	EPHB6	0	0	0	0	0	0	0
sgPRKAA1_7_chr5:40771893-	PRKAA1	0	0	0	0	0	0	0
sgMAPK1_4_chr22:22127206-	MAPK1	0	0	0	0	0	0	0
sgPSKH1_7_chr16:67943131+	PSKH1	0	0	0	0	0	0	0
CTRL0082	CTRL0082	0	0	0	0	0	0	0
sgMAP3K6_5_chr1:27689444+	MAP3K6	0	0	0	0	0	0	0
sgLIMK1_9_chr7:73522203+	LIMK1	0	0	0	0	0	0	0
sgBMP2K_1_chr4:79792014+	BMP2K	0	0	0	0	0	0	0
sgTAOK2_1_chr16:29992996-	TAOK2	0	0	0	0	0	0	0
sgVRK3_4_chr19:50511015-	VRK3	0	0	0	0	0	0	0
sgMAPK9_3_chr5:179688767-	MAPK9	0	0	0	0	0	0	0
sgSTK11_7_chr19:1221206+	STK11	0	0	0	0	0	0	0
sgPNCK_5_chrX:152936741+	PNCK	0	0	0	0	0	0	0
sgMAP3K15_9_chrX:19533114-	MAP3K15	0	0	0	0	0	0	0
CTRL0093	CTRL0093	0	0	0	0	0	0	0
sgSTK4_3_chr20:43600777+	STK4	0	0	0	0	0	0	0
sgSGK223_2_chr8:8235369-	SGK223	0	0	0	0	0	0	0
sgPRPF4B_4_chr6:4021667-	PRPF4B	0	0	0	0	0	0	0
sgRPS6KA5_8_chr14:91360759-	RPS6KA5	0	0	0	0	0	0	0
sgNEK7_1_chr1:198248103+	NEK7	0	0	0	0	0	0	0
sgRIOK2_10_chr5:96506900+	RIOK2	0	0	0	0	0	0	0
sgPRKCQ_2_chr10:6525524-	PRKCQ	0	0	0	0	0	0	0
sgMAP3K15_6_chrX:19533188+	MAP3K15	0	0	0	0	0	0	0
sgPRKCG_4_chr19:54393162-	PRKCG	0	0	0	0	0	0	0
sgSRPK3_4_chrX:153047010+	SRPK3	0	0	0	0	0	0	0
sgMAPK10_5_chr4:87022227-	MAPK10	0	0	0	0	0	0	0
sgMASTL_1_chr10:27462091+	MASTL	0	0	0	0	0	0	0
sgMAP3K19_9_chr2:135757525+	MAP3K19	0	0	0	0	0	0	0
sgERBB3_8_chr12:56478808-	ERBB3	0	0	0	0	0	0	0
sgDYRK3_5_chr1:206821499-	DYRK3	0	0	0	0	0	0	0
sgRPS6KA3_7_chrX:20174315+	RPS6KA3	0	0	0	0	0	0	0
sgTTK_7_chr6:80732168+	TTK	0	0	0	0	0	0	0
sgAAK1_2_chr2:69870138-	AAK1	0	0	0	0	0	0	0
sgPIM3_6_chr22:50356478+	PIM3	0	0	0	0	0	0	0
sgPRKX_2_chrX:3533904-	PRKX	0	0	0	0	0	0	0
sgSGK2_9_chr20:42199336-	SGK2	0	0	0	0	0	0	0
sgPEAK1_1_chr15:77474150-	PEAK1	0	0	0	0	0	0	0
sgTGFBR1_6_chr9:101908778-	TGFBR1	0	0	0	0	0	0	0
sgCDK20_8_chr9:90584201-	CDK20	0	0	0	0	0	0	0
sgCDK10_9_chr16:89757011+	CDK10	0	0	0	0	0	0	0
sgZAK_6_chr2:174081971-	ZAK	0	0	0	0	0	0	0
sgPRKG1_2_chr10:54031204+	PRKG1	0	0	0	0	0	0	0
sgMAPK13_5_chr6:36106200+	MAPK13	0	0	0	0	0	0	0
sgPRKCB_4_chr16:24183590+	PRKCB	0	0	0	0	0	0	0
sgEIF2AK2_1_chr2:37365690+	EIF2AK2	0	0	0	0	0	0	0
sgMATK_7_chr19:3784003+	MATK	0	0	0	0	0	0	0
sgSTK24_5_chr13:99109483-	STK24	0	0	0	0	0	0	0
sgMAPK15_6_chr8:144803433+	MAPK15	0	0	0	0	0	0	0
sgFER_3_chr5:108203602-	FER	0	0	0	0	0	0	0
sgCHEK2_8_chr22:29091773+	CHEK2	0	0	0	0	0	0	0
sgSTK10_4_chr5:171615026+	STK10	0	0	0	0	0	0	0
sgRPS6KA1_5_chr1:26885401+	RPS6KA1	0	0	0	0	0	0	0
sgMAPKAPK5_5_chr12:112323774+	MAPKAPK5	0	0	0	0	0	0	0
sgTTK_9_chr6:80720594+	TTK	0	0	0	0	0	0	0
sgMAST1_10_chr19:12962940-	MAST1	0	0	0	0	0	0	0
sgRPS6KA3_10_chrX:20213219-	RPS6KA3	0	0	0	0	0	0	0
sgPINK1_2_chr1:20964342+	PINK1	0	0	0	0	0	0	0
sgABL2_6_chr1:179100579+	ABL2	0	0	0	0	0	0	0
sgSTRADB_10_chr2:202334743-	STRADB	0	0	0	0	0	0	0
sgSIK3_3_chr11:116744211+	SIK3	0	0	0	0	0	0	0
sgPRKACG_10_chr9:71628183-	PRKACG	0	0	0	0	0	0	0
sgSTRADB_7_chr2:202342893+	STRADB	0	0	0	0	0	0	0
sgTAF1L_8_chr9:32634133+	TAF1L	0	0	0	0	0	0	0
sgGUCY2C_2_chr12:14794109+	GUCY2C	0	0	0	0	0	0	0
sgALPK1_7_chr4:113299033+	ALPK1	0	0	0	0	0	0	0
sgUHMK1_10_chr1:162469896-	UHMK1	0	0	0	0	0	0	0
sgLIMK2_8_chr22:31671243-	LIMK2	0	0	0	0	0	0	0
sgSMG1_2_chr16:18861301-	SMG1	0	0	0	0	0	0	0
sgMYLK_2_chr3:123339100-	MYLK	0	0	0	0	0	0	0
sgCDK9_5_chr9:130548429-	CDK9	0	0	0	0	0	0	0
sgAKT2_7_chr19:40762881-	AKT2	0	0	0	0	0	0	0
sgNEK1_10_chr4:170506592+	NEK1	0	0	0	0	0	0	0
sgCDKL3_4_chr5:133657528+	CDKL3	0	0	0	0	0	0	0
sgLRRK2_9_chr12:40704327+	LRRK2	0	0	0	0	0	0	0
sgCDC7_2_chr1:91978623-	CDC7	0	0	0	0	0	0	0
sgCDK10_8_chr16:89760613-	CDK10	0	0	0	0	0	0	0
sgSRC_5_chr20:36030058-	SRC	0	0	0	0	0	0	0
sgCHEK1_1_chr11:125513716+	CHEK1	0	0	0	0	0	0	0
sgCDK16_5_chrX:47085719-	CDK16	0	0	0	0	0	0	0
sgPRKCZ_10_chr1:2087490-	PRKCZ	0	0	0	0	0	0	0
sgTNNI3K_2_chr1:74737327+	TNNI3K	0	0	0	0	0	0	0
sgMYLK2_8_chr20:30414639+	MYLK2	0	0	0	0	0	0	0
sgDDR1_9_chr6:30862360-	DDR1	0	0	0	0	0	0	0
sgMOS_9_chr8:57026303-	MOS	0	0	0	0	0	0	0
sgFLT4_10_chr5:180052858+	FLT4	0	0	0	0	0	0	0
sgCDK2_9_chr12:56364999-	CDK2	0	0	0	0	0	0	0
sgTEX14_6_chr17:56688583+	TEX14	0	0	0	0	0	0	0
sgABL2_4_chr1:179090939-	ABL2	0	0	0	0	0	0	0
sgMAP3K13_6_chr3:185191197-	MAP3K13	0	0	0	0	0	0	0
sgEPHB1_8_chr3:134880891+	EPHB1	0	0	0	0	0	0	0
sgTTBK1_9_chr6:43250578+	TTBK1	0	0	0	0	0	0	0
sgMAP4K5_3_chr14:50998722+	MAP4K5	0	0	0	0	0	0	0
sgHCK_5_chr20:30659536-	HCK	0	0	0	0	0	0	0
sgMAPK12_1_chr22:50699683+	MAPK12	0	0	0	0	0	0	0
sgWNK2_10_chr9:95947342+	WNK2	0	0	0	0	0	0	0
sgCDKL2_4_chr4:76532427+	CDKL2	0	0	0	0	0	0	0
sgTRIB1_10_chr8:126443243+	TRIB1	0	0	0	0	0	0	0
sgMAPKAPK3_5_chr3:50654996+	MAPKAPK3	0	0	0	0	0	0	0
sgMAST1_7_chr19:12958197+	MAST1	0	0	0	0	0	0	0
sgIGF1R_5_chr15:99434793+	IGF1R	0	0	0	0	0	0	0
sgATM_10_chr11:108138048+	ATM	0	0	0	0	0	0	0
sgMAST3_8_chr19:18235491+	MAST3	0	0	0	0	0	0	0
sgTYRO3_4_chr15:41861069+	TYRO3	0	0	0	0	0	0	0
sgTRIB2_7_chr2:12863425-	TRIB2	0	0	0	0	0	0	0
sgCASK_5_chrX:41485921+	CASK	0	0	0	0	0	0	0
sgBTK_3_chrX:100625008-	BTK	0	0	0	0	0	0	0
sgPDGFRA_9_chr4:55156509+	PDGFRA	0	0	0	0	0	0	0
CTRL0011	CTRL0011	0	0	0	0	0	0	0
sgTTN_10_chr2:179650698+	TTN	0	0	0	0	0	0	0
sgSTK4_9_chr20:43595208+	STK4	0	0	0	0	0	0	0
sgFGFR3_3_chr4:1803677+	FGFR3	0	0	0	0	0	0	0
sgRYK_9_chr3:133969268-	RYK	0	0	0	0	0	0	0
sgMERTK_7_chr2:112686912-	MERTK	0	0	0	0	0	0	0
CTRL0073	CTRL0073	0	0	0	0	0	0	0
sgEPHB6_6_chr7:142563351+	EPHB6	0	0	0	0	0	0	0
sgPAK4_7_chr19:39660304+	PAK4	0	0	0	0	0	0	0
sgCAMK2D_4_chr4:114430796-	CAMK2D	0	0	0	0	0	0	0
sgPRKAA2_1_chr1:57111093+	PRKAA2	0	0	0	0	0	0	0
sgHCK_10_chr20:30672301+	HCK	0	0	0	0	0	0	0
sgGRK7_7_chr3:141497525+	GRK7	0	0	0	0	0	0	0
sgCLK1_6_chr2:201726471-	CLK1	0	0	0	0	0	0	0
sgCSNK2A2_8_chr16:58199488-	CSNK2A2	0	0	0	0	0	0	0
sgPRKCB_7_chr16:24185862-	PRKCB	0	0	0	0	0	0	0
sgPRKCQ_6_chr10:6472819-	PRKCQ	0	0	0	0	0	0	0
sgCSNK1G1_7_chr15:64472637-	CSNK1G1	0	0	0	0	0	0	0
sgTTBK2_9_chr15:43045276-	TTBK2	0	0	0	0	0	0	0
sgSCYL1_9_chr11:65304515+	SCYL1	0	0	0	0	0	0	0
sgALPK2_8_chr18:56246402-	ALPK2	0	0	0	0	0	0	0
sgPHKG1_3_chr7:56155300+	PHKG1	0	0	0	0	0	0	0
sgTEC_5_chr4:48140729+	TEC	0	0	0	0	0	0	0
sgCDKL2_2_chr4:76532388-	CDKL2	0	0	0	0	0	0	0
sgCAMKV_1_chr3:49898940-	CAMKV	0	0	0	0	0	0	0
sgICK_4_chr6:52874284+	ICK	0	0	0	0	0	0	0
sgCHEK2_5_chr22:29095918-	CHEK2	0	0	0	0	0	0	0
sgNUAK1_9_chr12:106480556+	NUAK1	0	0	0	0	0	0	0
sgMAP3K5_9_chr6:137041719-	MAP3K5	0	0	0	0	0	0	0
sgEPHA4_3_chr2:222428616-	EPHA4	0	0	0	0	0	0	0
sgMINK1_2_chr17:4736898-	MINK1	0	0	0	0	0	0	0
sgBMP2K_3_chr4:79747203-	BMP2K	0	0	0	0	0	0	0
sgEPHA3_4_chr3:89176415-	EPHA3	0	0	0	0	0	0	0
sgPHKG2_8_chr16:30760141+	PHKG2	0	0	0	0	0	0	0
sgCDK19_2_chr6:110988648+	CDK19	0	0	0	0	0	0	0
sgCLK2_1_chr1:155239315-	CLK2	0	0	0	0	0	0	0
sgPLK3_8_chr1:45266526-	PLK3	0	0	0	0	0	0	0
sgBRD3_7_chr9:136905259-	BRD3	0	0	0	0	0	0	0
sgRPS6KC1_8_chr1:213341296-	RPS6KC1	0	0	0	0	0	0	0
sgDYRK2_5_chr12:68052117+	DYRK2	0	0	0	0	0	0	0
sgMAST4_8_chr5:66055575+	MAST4	0	0	0	0	0	0	0
sgPRKACA_4_chr19:14208218+	PRKACA	0	0	0	0	0	0	0
sgARAF_6_chrX:47422390-	ARAF	0	0	0	0	0	0	0
sgBRSK1_5_chr19:55815952+	BRSK1	0	0	0	0	0	0	0
sgPRKCE_5_chr2:46234704-	PRKCE	0	0	0	0	0	0	0
sgPIM1_1_chr6:37139095-	PIM1	0	0	0	0	0	0	0
sgTTBK2_10_chr15:43044706-	TTBK2	0	0	0	0	0	0	0
sgPRKCA_4_chr17:64683346+	PRKCA	0	0	0	0	0	0	0
sgBRDT_7_chr1:92446439+	BRDT	0	0	0	0	0	0	0
sgMKNK1_6_chr1:47042309-	MKNK1	0	0	0	0	0	0	0
sgSRMS_2_chr20:62173853-	SRMS	0	0	0	0	0	0	0
sgMAP3K13_4_chr3:185183619+	MAP3K13	0	0	0	0	0	0	0
sgADCK3_1_chr1:227149167+	ADCK3	0	0	0	0	0	0	0
sgSCYL3_9_chr1:169857819-	SCYL3	0	0	0	0	0	0	0
sgPRKX_10_chrX:3631225+	PRKX	0	0	0	0	0	0	0
sgPAK7_4_chr20:9560856-	PAK7	0	0	0	0	0	0	0
sgERBB4_7_chr2:212587167+	ERBB4	0	0	0	0	0	0	0
sgCDC42BPA_1_chr1:227400839-	CDC42BPA	0	0	0	0	0	0	0
sgPRKAA1_3_chr5:40798236-	PRKAA1	0	0	0	0	0	0	0
sgCLK1_8_chr2:201719802-	CLK1	0	0	0	0	0	0	0
sgMAP3K15_8_chrX:19533156-	MAP3K15	0	0	0	0	0	0	0
sgAAK1_4_chr2:69734555-	AAK1	0	0	0	0	0	0	0
sgPDGFRB_8_chr5:149500802-	PDGFRB	0	0	0	0	0	0	0
sgTAOK2_9_chr16:29996724+	TAOK2	0	0	0	0	0	0	0
sgCSNK1A1_5_chr5:148930514-	CSNK1A1	0	0	0	0	0	0	0
sgMAP4K3_1_chr2:39664101+	MAP4K3	0	0	0	0	0	0	0
sgTEX14_4_chr17:56699078+	TEX14	0	0	0	0	0	0	0
sgMAP3K5_1_chr6:137113222+	MAP3K5	0	0	0	0	0	0	0
sgTEC_6_chr4:48140684-	TEC	0	0	0	0	0	0	0
sgTGFBR2_7_chr3:30713421-	TGFBR2	0	0	0	0	0	0	0
sgICK_10_chr6:52878562+	ICK	0	0	0	0	0	0	0
sgCHUK_10_chr10:101982709+	CHUK	0	0	0	0	0	0	0
CTRL0016	CTRL0016	0	0	0	0	0	0	0
sgSIK3_5_chr11:116734478+	SIK3	0	0	0	0	0	0	0
CTRL0035	CTRL0035	0	0	0	0	0	0	0
sgBMX_2_chrX:15540668+	BMX	0	0	0	0	0	0	0
sgCDC42BPB_8_chr14:103450033-	CDC42BPB	0	0	0	0	0	0	0
sgAATK_1_chr17:79096095+	AATK	0	0	0	0	0	0	0
sgTGFBR1_1_chr9:101867523+	TGFBR1	0	0	0	0	0	0	0
sgAKT1_10_chr14:105242060-	AKT1	0	0	0	0	0	0	0
sgCDKL2_7_chr4:76525500+	CDKL2	0	0	0	0	0	0	0
sgPRKCH_4_chr14:61789062-	PRKCH	0	0	0	0	0	0	0
sgMYLK_3_chr3:123337522-	MYLK	0	0	0	0	0	0	0
sgAKT1_4_chr14:105246534-	AKT1	0	0	0	0	0	0	0
sgTRIB1_1_chr8:126445746-	TRIB1	0	0	0	0	0	0	0
sgADRBK1_3_chr11:67052369+	ADRBK1	0	0	0	0	0	0	0
sgCDK7_6_chr5:68568763-	CDK7	0	0	0	0	0	0	0
sgCAMK2B_5_chr7:44298499-	CAMK2B	0	0	0	0	0	0	0
sgULK2_10_chr17:19685298-	ULK2	0	0	0	0	0	0	0
sgMAP4K4_2_chr2:102460736+	MAP4K4	0	0	0	0	0	0	0
sgSTK32A_5_chr5:146658908+	STK32A	0	0	0	0	0	0	0
sgSTK11_8_chr19:1221263+	STK11	0	0	0	0	0	0	0
sgBMPR1A_9_chr10:88678937+	BMPR1A	0	0	0	0	0	0	0
sgMAPK13_3_chr6:36106750+	MAPK13	0	0	0	0	0	0	0
sgPRKDC_6_chr8:48872640-	PRKDC	0	0	0	0	0	0	0
sgEPHA3_3_chr3:89156925-	EPHA3	0	0	0	0	0	0	0
sgMARK4_3_chr19:45774942-	MARK4	0	0	0	0	0	0	0
sgRPS6KB2_1_chr11:67196594+	RPS6KB2	0	0	0	0	0	0	0
sgMET_5_chr7:116380982-	MET	0	0	0	0	0	0	0
sgMAPK15_10_chr8:144800423+	MAPK15	0	0	0	0	0	0	0
sgDCLK2_9_chr4:151000527-	DCLK2	0	0	0	0	0	0	0
sgSRPK3_7_chrX:153050584-	SRPK3	0	0	0	0	0	0	0
sgRPS6KL1_5_chr14:75386567-	RPS6KL1	0	0	0	0	0	0	0
sgEPHB2_2_chr1:23111548+	EPHB2	0	0	0	0	0	0	0
sgCDC42BPG_2_chr11:64601926-	CDC42BPG	0	0	0	0	0	0	0
sgLRRK1_4_chr15:101464870+	LRRK1	0	0	0	0	0	0	0
sgMINK1_3_chr17:4784314+	MINK1	0	0	0	0	0	0	0
sgGSK3A_6_chr19:42736784+	GSK3A	0	0	0	0	0	0	0
sgBUB1_4_chr2:111398623-	BUB1	0	0	0	0	0	0	0
sgBMPR2_8_chr2:203242234-	BMPR2	0	0	0	0	0	0	0
sgEPHB2_3_chr1:23191418-	EPHB2	0	0	0	0	0	0	0
sgMYLK4_10_chr6:2685719-	MYLK4	0	0	0	0	0	0	0
sgPRKACB_2_chr1:84662353-	PRKACB	0	0	0	0	0	0	0
sgSTK17A_8_chr7:43663198+	STK17A	0	0	0	0	0	0	0
sgDDR1_8_chr6:30862272+	DDR1	0	0	0	0	0	0	0
sgVRK1_8_chr14:97319482+	VRK1	0	0	0	0	0	0	0
sgITK_6_chr5:156638318-	ITK	0	0	0	0	0	0	0
sgNRBP1_2_chr2:27656641+	NRBP1	0	0	0	0	0	0	0
sgULK1_1_chr12:132380193-	ULK1	0	0	0	0	0	0	0
sgNPR1_4_chr1:153651617-	NPR1	0	0	0	0	0	0	0
sgCDK19_10_chr6:110942299+	CDK19	0	0	0	0	0	0	0
sgCLK4_10_chr5:178050298-	CLK4	0	0	0	0	0	0	0
sgCSNK1A1_8_chr5:148889445+	CSNK1A1	0	0	0	0	0	0	0
sgCDK16_9_chrX:47084097-	CDK16	0	0	0	0	0	0	0
sgCAMKK1_9_chr17:3786338-	CAMKK1	0	0	0	0	0	0	0
sgCDK5_2_chr7:150751525-	CDK5	0	0	0	0	0	0	0
sgTESK2_10_chr1:45923399+	TESK2	0	0	0	0	0	0	0
sgSTK31_8_chr7:23775271+	STK31	0	0	0	0	0	0	0
sgULK2_1_chr17:19705106+	ULK2	0	0	0	0	0	0	0
sgNPR2_9_chr9:35808637-	NPR2	0	0	0	0	0	0	0
sgULK3_3_chr15:75134701-	ULK3	0	0	0	0	0	0	0
sgTSSK3_4_chr1:32828317+	TSSK3	0	0	0	0	0	0	0
CTRL0097	CTRL0097	0	0	0	0	0	0	0
sgHIPK3_2_chr11:33370294-	HIPK3	0	0	0	0	0	0	0
sgINSR_3_chr19:7293806-	INSR	0	0	0	0	0	0	0
sgPLK1_7_chr16:23692251+	PLK1	0	0	0	0	0	0	0
CTRL0004	CTRL0004	0	0	0	0	0	0	0
sgRPS6KA1_9_chr1:26882047-	RPS6KA1	0	0	0	0	0	0	0
sgRNASEL_1_chr1:182555440-	RNASEL	0	0	0	0	0	0	0
sgSTK25_4_chr2:242441027-	STK25	0	0	0	0	0	0	0
sgSTK32A_2_chr5:146703495+	STK32A	0	0	0	0	0	0	0
sgLYN_1_chr8:56860259+	LYN	0	0	0	0	0	0	0
sgMARK1_9_chr1:220791863-	MARK1	0	0	0	0	0	0	0
sgPRKCG_10_chr19:54401250-	PRKCG	0	0	0	0	0	0	0
sgBRSK1_2_chr19:55800902+	BRSK1	0	0	0	0	0	0	0
sgLTK_7_chr15:41803656-	LTK	0	0	0	0	0	0	0
sgOXSR1_9_chr3:38287635-	OXSR1	0	0	0	0	0	0	0
sgNUAK2_4_chr1:205280891-	NUAK2	0	0	0	0	0	0	0
sgROS1_3_chr6:117717395-	ROS1	0	0	0	0	0	0	0
sgNRK_10_chrX:105075090+	NRK	0	0	0	0	0	0	0
sgMERTK_8_chr2:112705035-	MERTK	0	0	0	0	0	0	0
sgNEK4_9_chr3:52780854+	NEK4	0	0	0	0	0	0	0
sgTXK_3_chr4:48114347-	TXK	0	0	0	0	0	0	0
sgWNK4_4_chr17:40947171-	WNK4	0	0	0	0	0	0	0
sgDYRK1B_5_chr19:40321118-	DYRK1B	0	0	0	0	0	0	0
sgCDKL2_6_chr4:76530741+	CDKL2	0	0	0	0	0	0	0
sgEIF2AK4_6_chr15:40259717-	EIF2AK4	0	0	0	0	0	0	0
sgMAPKAPK2_7_chr1:206902083+	MAPKAPK2	0	0	0	0	0	0	0
sgINSR_6_chr19:7267393+	INSR	0	0	0	0	0	0	0
sgMAP3K4_3_chr6:161502021+	MAP3K4	0	0	0	0	0	0	0
sgAURKB_1_chr17:8110910-	AURKB	0	0	0	0	0	0	0
sgAATK_3_chr17:79095535+	AATK	0	0	0	0	0	0	0
sgLRRK1_8_chr15:101523807+	LRRK1	0	0	0	0	0	0	0
sgCDK12_5_chr17:37627781-	CDK12	0	0	0	0	0	0	0
sgSTK33_2_chr11:8496328+	STK33	0	0	0	0	0	0	0
sgAURKA_5_chr20:54945658+	AURKA	0	0	0	0	0	0	0
sgPIM1_3_chr6:37138753+	PIM1	0	0	0	0	0	0	0
sgDDR2_3_chr1:162743258+	DDR2	0	0	0	0	0	0	0
sgCDK6_1_chr7:92462531-	CDK6	0	0	0	0	0	0	0
sgEIF2AK1_6_chr7:6098662-	EIF2AK1	0	0	0	0	0	0	0
sgMYLK4_7_chr6:2693063-	MYLK4	0	0	0	0	0	0	0
sgDAPK2_2_chr15:64332409-	DAPK2	0	0	0	0	0	0	0
sgCSNK1G2_5_chr19:1979513-	CSNK1G2	0	0	0	0	0	0	0
sgDCLK3_9_chr3:36779509-	DCLK3	0	0	0	0	0	0	0
sgEIF2AK1_7_chr7:6094237+	EIF2AK1	0	0	0	0	0	0	0
sgTRIM33_5_chr1:114968129+	TRIM33	0	0	0	0	0	0	0
sgDCLK1_4_chr13:36385011+	DCLK1	0	0	0	0	0	0	0
sgMAK_7_chr6:10796307+	MAK	0	0	0	0	0	0	0
sgROR1_6_chr1:64515589+	ROR1	0	0	0	0	0	0	0
sgPLK4_1_chr4:128807576+	PLK4	0	0	0	0	0	0	0
sgCDC7_5_chr1:91967325-	CDC7	0	0	0	0	0	0	0
sgGSG2_10_chr17:3627990-	GSG2	0	0	0	0	0	0	0
sgFGFR2_9_chr10:123298100+	FGFR2	0	0	0	0	0	0	0
sgTLK2_3_chr17:60655858+	TLK2	0	0	0	0	0	0	0
sgRPS6KA6_10_chrX:83390206-	RPS6KA6	0	0	0	0	0	0	0
sgFLT3_10_chr13:28626690-	FLT3	0	0	0	0	0	0	0
sgCHUK_6_chr10:101960461-	CHUK	0	0	0	0	0	0	0
sgNEK7_8_chr1:198222169+	NEK7	0	0	0	0	0	0	0
sgSTK32C_2_chr10:134041551-	STK32C	0	0	0	0	0	0	0
sgSTK25_8_chr2:242438469-	STK25	0	0	0	0	0	0	0
sgCSNK1D_9_chr17:80210390+	CSNK1D	0	0	0	0	0	0	0
sgPRKACB_3_chr1:84662308-	PRKACB	0	0	0	0	0	0	0
sgSLK_6_chr10:105770611+	SLK	0	0	0	0	0	0	0
sgADCK1_6_chr14:78398003-	ADCK1	0	0	0	0	0	0	0
sgSGK3_5_chr8:67759500-	SGK3	0	0	0	0	0	0	0
sgJAK3_7_chr19:17952225+	JAK3	0	0	0	0	0	0	0
sgFER_6_chr5:108168623+	FER	0	0	0	0	0	0	0
sgTLK1_4_chr2:171913069-	TLK1	0	0	0	0	0	0	0
sgSTK33_10_chr11:8478995-	STK33	0	0	0	0	0	0	0
sgBMPR1A_6_chr10:88659613-	BMPR1A	0	0	0	0	0	0	0
sgNEK11_7_chr3:130871532-	NEK11	0	0	0	0	0	0	0
sgMINK1_10_chr17:4792962+	MINK1	0	0	0	0	0	0	0
sgTSSK6_2_chr19:19626113-	TSSK6	0	0	0	0	0	0	0
sgTP53RK_7_chr20:45317804-	TP53RK	0	0	0	0	0	0	0
sgADCK2_1_chr7:140380865+	ADCK2	0	0	0	0	0	0	0
sgSLK_5_chr10:105763200-	SLK	0	0	0	0	0	0	0
sgPKDCC_8_chr2:42281257-	PKDCC	0	0	0	0	0	0	0
sgAKT1_5_chr14:105246467-	AKT1	0	0	0	0	0	0	0
sgFGR_6_chr1:27941993-	FGR	0	0	0	0	0	0	0
sgMAP3K10_8_chr19:40712011+	MAP3K10	0	0	0	0	0	0	0
sgHIPK3_1_chr11:33369232-	HIPK3	0	0	0	0	0	0	0
sgLMTK3_6_chr19:49013791+	LMTK3	0	0	0	0	0	0	0
sgPIM2_1_chrX:48772482-	PIM2	0	0	0	0	0	0	0
sgRIPK3_6_chr14:24808368+	RIPK3	0	0	0	0	0	0	0
CTRL0047	CTRL0047	0	0	0	0	0	0	0
sgACVR2A_7_chr2:148676066+	ACVR2A	0	0	0	0	0	0	0
sgZAK_7_chr2:174034553-	ZAK	0	0	0	0	0	0	0
sgSTRADB_6_chr2:202337778+	STRADB	0	0	0	0	0	0	0
sgPRKD2_10_chr19:47193871-	PRKD2	0	0	0	0	0	0	0
sgPRKACG_3_chr9:71628972-	PRKACG	0	0	0	0	0	0	0
sgTAF1L_9_chr9:32633532+	TAF1L	0	0	0	0	0	0	0
sgCAMKV_10_chr3:49897939-	CAMKV	0	0	0	0	0	0	0
sgBCR_4_chr22:23596088-	BCR	0	0	0	0	0	0	0
sgMUSK_3_chr9:113550018+	MUSK	0	0	0	0	0	0	0
sgTRRAP_6_chr7:98507747+	TRRAP	0	0	0	0	0	0	0
sgALPK1_2_chr4:113352375+	ALPK1	0	0	0	0	0	0	0
sgTXK_7_chr4:48116367-	TXK	0	0	0	0	0	0	0
sgLRRK1_2_chr15:101562700+	LRRK1	0	0	0	0	0	0	0
sgACVR2B_10_chr3:38519884-	ACVR2B	0	0	0	0	0	0	0
sgRIOK2_8_chr5:96512871-	RIOK2	0	0	0	0	0	0	0
sgRIPK3_7_chr14:24807724-	RIPK3	0	0	0	0	0	0	0
sgPHKG1_1_chr7:56155389-	PHKG1	0	0	0	0	0	0	0
sgPHKG1_7_chr7:56149675+	PHKG1	0	0	0	0	0	0	0
sgNPR2_5_chr9:35801643+	NPR2	0	0	0	0	0	0	0
sgMAP3K9_5_chr14:71275809-	MAP3K9	0	0	0	0	0	0	0
sgTRIB3_7_chr20:368867+	TRIB3	0	0	0	0	0	0	0
sgTLK2_8_chr17:60689837-	TLK2	0	0	0	0	0	0	0
sgPXK_1_chr3:58383355-	PXK	0	0	0	0	0	0	0
sgRPS6KA4_5_chr11:64127986+	RPS6KA4	0	0	0	0	0	0	0
sgPRPF4B_5_chr6:4032898-	PRPF4B	0	0	0	0	0	0	0
sgSLK_8_chr10:105727609+	SLK	0	0	0	0	0	0	0
sgMAPK13_9_chr6:36099060+	MAPK13	0	0	0	0	0	0	0
sgTRPM6_5_chr9:77454954-	TRPM6	0	0	0	0	0	0	0
sgCDK10_10_chr16:89757894+	CDK10	0	0	0	0	0	0	0
sgCDKL1_3_chr14:50807841+	CDKL1	0	0	0	0	0	0	0
sgCDK15_10_chr2:202677233+	CDK15	0	0	0	0	0	0	0
sgDYRK1B_6_chr19:40319167+	DYRK1B	0	0	0	0	0	0	0
sgPHKG1_4_chr7:56155336-	PHKG1	0	0	0	0	0	0	0
sgPKMYT1_7_chr16:3026769+	PKMYT1	0	0	0	0	0	0	0
sgMYLK4_3_chr6:2678548-	MYLK4	0	0	0	0	0	0	0
sgKIAA1804_6_chr1:233512247-	KIAA1804	0	0	0	0	0	0	0
sgRIOK2_2_chr5:96503261-	RIOK2	0	0	0	0	0	0	0
CTRL0095	CTRL0095	0	0	0	0	0	0	0
sgCLK3_1_chr15:74911584+	CLK3	0	0	0	0	0	0	0
sgMAP3K11_7_chr11:65375510-	MAP3K11	0	0	0	0	0	0	0
sgSRC_7_chr20:36030918+	SRC	0	0	0	0	0	0	0
sgRPS6KA1_2_chr1:26873695+	RPS6KA1	0	0	0	0	0	0	0
CTRL0005	CTRL0005	0	0	0	0	0	0	0
sgCDK17_9_chr12:96680478-	CDK17	0	0	0	0	0	0	0
sgDDR2_10_chr1:162731150+	DDR2	0	0	0	0	0	0	0
sgRIOK1_6_chr6:7405157-	RIOK1	0	0	0	0	0	0	0
sgEPHA3_7_chr3:89259510+	EPHA3	0	0	0	0	0	0	0
sgIGF1R_7_chr15:99454577-	IGF1R	0	0	0	0	0	0	0
sgCDK19_8_chr6:110942364-	CDK19	0	0	0	0	0	0	0
sgBMPR1B_2_chr4:96025602+	BMPR1B	0	0	0	0	0	0	0
sgSTK40_6_chr1:36826911-	STK40	0	0	0	0	0	0	0
sgNTRK3_6_chr15:88799247-	NTRK3	0	0	0	0	0	0	0
sgMAST2_9_chr1:46499570+	MAST2	0	0	0	0	0	0	0
sgBRD3_10_chr9:136918510+	BRD3	0	0	0	0	0	0	0
sgTNK1_2_chr17:7286875+	TNK1	0	0	0	0	0	0	0
sgACVRL1_3_chr12:52307103-	ACVRL1	0	0	0	0	0	0	0
sgLTK_4_chr15:41804940+	LTK	0	0	0	0	0	0	0
sgPAK1_3_chr11:77064583-	PAK1	0	0	0	0	0	0	0
sgPAK2_6_chr3:196541349+	PAK2	0	0	0	0	0	0	0
sgSTK38L_5_chr12:27450685-	STK38L	0	0	0	0	0	0	0
sgPLK1_10_chr16:23695319-	PLK1	0	0	0	0	0	0	0
sgPHKG1_8_chr7:56149400-	PHKG1	0	0	0	0	0	0	0
sgSBK2_7_chr19:56047643-	SBK2	0	0	0	0	0	0	0
sgTAOK3_1_chr12:118610264-	TAOK3	0	0	0	0	0	0	0
sgPRKD1_4_chr14:30132956+	PRKD1	0	0	0	0	0	0	0
sgNUAK2_9_chr1:205290642-	NUAK2	0	0	0	0	0	0	0
sgTEX14_8_chr17:56676769+	TEX14	0	0	0	0	0	0	0
sgBCKDK_4_chr16:31120661-	BCKDK	0	0	0	0	0	0	0
sgMINK1_7_chr17:4790434+	MINK1	0	0	0	0	0	0	0
sgSIK1_9_chr21:44840116-	SIK1	0	0	0	0	0	0	0
sgROCK1_10_chr18:18547736-	ROCK1	0	0	0	0	0	0	0
sgPDPK1_1_chr16:2636726-	PDPK1	0	0	0	0	0	0	0
sgCAMK2B_7_chr7:44282200+	CAMK2B	0	0	0	0	0	0	0
sgPRKCE_3_chr2:46234638+	PRKCE	0	0	0	0	0	0	0
sgBMP2K_7_chr4:79793859-	BMP2K	0	0	0	0	0	0	0
sgMAP2K3_8_chr17:21208419+	MAP2K3	0	0	0	0	0	0	0
sgNRBP1_1_chr2:27656237-	NRBP1	0	0	0	0	0	0	0
sgADCK2_7_chr7:140373661-	ADCK2	0	0	0	0	0	0	0
sgMINK1_9_chr17:4792928+	MINK1	0	0	0	0	0	0	0
sgNRBP2_9_chr8:144919431-	NRBP2	0	0	0	0	0	0	0
sgLMTK2_5_chr7:97820973-	LMTK2	0	0	0	0	0	0	0
sgSIK1_10_chr21:44839102-	SIK1	0	0	0	0	0	0	0
sgGSG2_9_chr17:3627895+	GSG2	0	0	0	0	0	0	0
[truncated: 3,172 more rows]
